# Supplementary material for: COVID-19 prevention practices in urban setting during early introduction of the disease: results from community survey in SNNP Region, Ethiopia
Source: PubMed Central journal article supplement — BMJ Open. 2021 May 28;11(5):e047373. doi: 10.1136/bmjopen-2020-047373 (PMC8166455; doi:10.1136/bmjopen-2020-047373), 2021-05-28
Supplement: bmjopen-2020-047373.draft_revisions.pdf [file bmjopen-2020-047373.draft_revisions.pdf]

# BMJ Open

BMJ Open is committed to open peer review. As part of this commitment we make the peer review history of every article we publish publicly available.

When an article is published we post the peer reviewers' comments and the authors' responses online. We also post the versions of the paper that were used during peer review. These are the versions that the peer review comments apply to.

The versions of the paper that follow are the versions that were submitted during the peer review process. They are not the versions of record or the final published versions. They should not be cited or distributed as the published version of this manuscript.

BMJ Open is an open access journal and the full, final, typeset and author-corrected version of record of the manuscript is available on our site with no access controls, subscription charges or pay-per-view fees (<http://bmjopen.bmj.com>).

If you have any questions on BMJ Open's open peer review process please email [info.bmjopen@bmj.com](mailto:info.bmjopen@bmj.com)

# BMJ Open

## COVID-19 prevention practices in urban setting during early introduction of the disease: results from community survey in SNNP Region, Ethiopia

|                               |                                                                                                                                                                                                                                                                                                                                                                                                                                                                                                                                                |
|-------------------------------|------------------------------------------------------------------------------------------------------------------------------------------------------------------------------------------------------------------------------------------------------------------------------------------------------------------------------------------------------------------------------------------------------------------------------------------------------------------------------------------------------------------------------------------------|
| Journal:                      | <i>BMJ Open</i>                                                                                                                                                                                                                                                                                                                                                                                                                                                                                                                                |
| Manuscript ID                 | bmjopen-2020-047373                                                                                                                                                                                                                                                                                                                                                                                                                                                                                                                            |
| Article Type:                 | Original research                                                                                                                                                                                                                                                                                                                                                                                                                                                                                                                              |
| Date Submitted by the Author: | 05-Dec-2020                                                                                                                                                                                                                                                                                                                                                                                                                                                                                                                                    |
| Complete List of Authors:     | Endriyas, Misganu; Southern Nations Nationalities and Peoples' Region Health Bureau, Health research and technology transfer<br>Kawza, Aknaw; Southern Nations Nationalities and Peoples' Region Health Bureau, Head office<br>Alano, Abraham ; SNNPR President office, SNNPR Policy study and research institute<br>Hussen, Mamush; Southern Nations Nationalities and Peoples' Region Health Bureau, Public health institute<br>Shibru, Endashaw ; Southern Nations Nationalities and Peoples' Region Health Bureau, Public health institute |
| Keywords:                     | Public health < INFECTIOUS DISEASES, COVID-19, HEALTH SERVICES ADMINISTRATION & MANAGEMENT                                                                                                                                                                                                                                                                                                                                                                                                                                                     |
|                               |                                                                                                                                                                                                                                                                                                                                                                                                                                                                                                                                                |

SCHOLARONE™  
Manuscripts

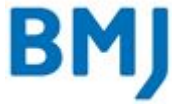

I, the Submitting Author has the right to grant and does grant on behalf of all authors of the Work (as defined in the below author licence), an exclusive licence and/or a non-exclusive licence for contributions from authors who are: i) UK Crown employees; ii) where BMJ has agreed a CC-BY licence shall apply, and/or iii) in accordance with the terms applicable for US Federal Government officers or employees acting as part of their official duties; on a worldwide, perpetual, irrevocable, royalty-free basis to BMJ Publishing Group Ltd ("BMJ") its licensees and where the relevant Journal is co-owned by BMJ to the co-owners of the Journal, to publish the Work in this journal and any other BMJ products and to exploit all rights, as set out in our [licence](#).

The Submitting Author accepts and understands that any supply made under these terms is made by BMJ to the Submitting Author unless you are acting as an employee on behalf of your employer or a postgraduate student of an affiliated institution which is paying any applicable article publishing charge ("APC") for Open Access articles. Where the Submitting Author wishes to make the Work available on an Open Access basis (and intends to pay the relevant APC), the terms of reuse of such Open Access shall be governed by a Creative Commons licence – details of these licences and which [Creative Commons](#) licence will apply to this Work are set out in our licence referred to above.

Other than as permitted in any relevant BMJ Author's Self Archiving Policies, I confirm this Work has not been accepted for publication elsewhere, is not being considered for publication elsewhere and does not duplicate material already published. I confirm all authors consent to publication of this Work and authorise the granting of this licence.

# COVID-19 prevention practices in urban setting during early introduction of the disease: results from community survey in SNNP Region, Ethiopia

Misganu Endriyas, Aknaw Kawza, Abraham Alano, Mamush Hussen, Endashaw Shibru

1. Misganu Endriyas (Corresponding author): Health research and technology directorate, SNNPR Health Bureau, Hawassa, Ethiopia (email – [misganuendrias@yahoo.com](mailto:misganuendrias@yahoo.com))
2. Aknaw Kawza: Head office, SNNPR Health Bureau, Hawassa, Ethiopia (email – [aknak77@gmail.com](mailto:aknak77@gmail.com))
3. Abraham Alano: SNNPR Policy study and research institute, SNNPR President office, Hawassa, Ethiopia (email – [alanoabraham@yahoo.com](mailto:alanoabraham@yahoo.com))
4. Mamush Hussen: Public health institute, SNNPR Health Bureau, Hawassa, Ethiopia (email – [mamushhussen2@gmail.com](mailto:mamushhussen2@gmail.com))
5. Endashaw Shibru: Public health institute, SNNPR Health Bureau, Hawassa, Ethiopia (email – [endash\\_s@yahoo.com](mailto:endash_s@yahoo.com))

## Abstract

**Objective:** To assess community practices related to COVID-19 prevention methods and its associated factors during early introduction of the disease to the study area.

**Setting and participants:** Community based cross sectional study was conducted in Southern, Nations, Nationalities and People's Region, Ethiopia. Ten zonal towns with high population density and mobility and 1239 participants were included in the study.

**Outcome measure:** Semi-structured questionnaire was uploaded to SurveyCTO data collection system with security patterns. Mask use was assessed by observation while social distancing and hand washing were assessed by interview. Data was collected by health professionals who have BSc and above and analyzed using SPSS version 25. Descriptive statistics and binary logistic regression was performed.

1  
2  
3 **Results:** From 1239 individuals, about half, 657 (53%), of respondents were females and about  
4 two thirds, 795 (64.2%), were married. Nearly nine from 10 (90.3%) and about eight from 10  
5 (82.0%) of respondents reported that they frequently wash hands with soap and/or use sanitizer  
6 and keep social distancing as means to prevent COVID-19 respectively. Less than three fifths  
7 (57.8%) of respondents wore mask during interview. In summary, about half (48.9%) of  
8 respondents were practicing the three recommended methods (social distancing, clean hands and  
9 wearing mask). Sex, educational status, family size and overall knowledge about COVID-19 were  
10 associated with practicing COVID-19 prevention measures.  
11  
12  
13  
14  
15  
16  
17

18 **Conclusion:** COVID-19 prevention practice was low as only about half of participants were  
19 practicing social distancing, clean hands and wear mask. Sex, educational status, family size and  
20 overall knowledge about COVID-19 were associated with practicing COVID-19 prevention  
21 measures. Although awareness creation has been implemented through different medias, it should  
22 be strengthened in different local languages. Concerned government bodies should strictly follow  
23 mask use in public gatherings.  
24  
25  
26  
27  
28

29 **Key words:** COVID-19, knowledge, attitude, practice  
30  
31  
32  
33

### 34 **Strengths and limitations of this study**

- 35 • Current study is first to cover multi-centers (ten towns with adequate sample size) and  
36 report regional level COVID-19 prevention practices at community level
- 37 • The result shows poor community practice to prevent COVID-19 pandemic needing  
38 organized response
- 39 • Even though this study covered majority of towns in the region, this study was limited in  
40 addressing smaller towns and rural areas that account for majority of regional population.  
41  
42  
43  
44  
45  
46  
47  
48  
49

### 50 **Introduction**

51  
52 The global pandemic, COVID-19 (Coronavirus disease 2019), is highly infectious viral disease,  
53 and its main clinical symptoms include fever, dry cough, fatigue, myalgia, and dyspnea[1, 2].  
54 COVID-19 as a global pandemic continue causing huge social and economic impact and stress on  
55  
56  
57

1  
2  
3 the health care system of all countries in the world[3, 4] though many efforts have been carried  
4 out to contain the virus since declaration of the disease as pandemic[5].  
5  
6

7 Prevention of COVID-19 in African setting, especially in urban setting is challenging because of  
8 dense population, with small informal dwellings, lack of access to clean water, comprised of multi-  
9 generational households with shared sanitation facilities, high level of social mixing, and transient  
10 residents[6, 7] and presence of non-specific symptoms of endemic illnesses such as malaria and  
11 influenza that make it difficult to differentiate from COVID-19 symptoms[6].  
12  
13  
14  
15

16  
17 In Ethiopia, the first case of COVID-19 was registered in March, 2020 and in the study region, it  
18 was registered in early May, 2020. Since then, the ministry of health and regional bureau in  
19 collaboration with different stakeholders have been doing different activities to prevent and control  
20 the spread of the disease but there was no community based evidence showing COVID-19  
21 prevention practices. To assist these responses, this study assessed practices related to COVID-19  
22 prevention activities and its associated factors in selected zonal towns in Southern, Nations,  
23 Nationalities and People's Region (SNNPR), Ethiopia.  
24  
25  
26  
27  
28  
29  
30

## 31 **Methods**

32  
33  
34 Community based cross sectional study was carried out from May 18 to June 10, 2020 in selected  
35 towns of SNNPR. SNNPR is the third largest region representing nearly 20% population of the  
36 country. The region has more than 56 ethnic groups and languages making it the most diverse  
37 region in the country. The region is administratively sub divided in to 18 zones, one city  
38 administration and seven special woredas. Woreda is administrative structure equivalent to district  
39 with approximately 100000 population. According to the census of 2007, the total population of the  
40 region is projected to be about 20.5 million.  
41  
42  
43  
44  
45

46  
47 Sample size was estimated using a single population proportion formula at 95% confidence level  
48 assuming proportion of population with good knowledge to be 50% and considering 5% margin  
49 of error, design effect of three and 10% non-response rate and the final sample size was 1268. The  
50 calculated sample size was allocated to ten zonal towns based on the size of population. Ten towns  
51 were purposely selected considering potential risk of COVID-19, crowdedness and high mobility.  
52  
53  
54  
55  
56  
57

1  
2  
3 At the time of data collection, the country declared state of emergency that was not strict and some  
4 people were moving in towns. To include both population staying at home and out of home, one-  
5 third of estimated sample size was allocated to out of home population in towns and the rest two-  
6 thirds were allocated to population staying at home.  
7  
8  
9

10 In study setting, towns are structured to the smallest administrative unit, kebeles. Kebeles in the  
11 towns were listed and two kebeles random samples were selected from each town. To select  
12 individual respondents, data collectors went to the center of selected kebeles and pin pen to select  
13 the direction to start first house. The next household was selected from next adjacent block in  
14 parallel position and continued until sample size was fulfilled. Concerning out of home population,  
15 every other person that data collectors met while moving to next block were selected and  
16 interviewed and continued until sample size was fulfilled. Residing in the selected kebeles for at  
17 least for six months was considered as eligibility criteria.  
18  
19  
20  
21  
22  
23  
24

25 The questionnaire was prepared by reviewing relevant literatures [7-9] and pretested. Almost all  
26 questions had “others” options and space to type other responses. The questionnaire was initially  
27 prepared in English, and then translated to Amharic. The tool consisted socio-demographic  
28 characteristics, exposure to COVID-19 messages and knowledge, attitude and practice about  
29 COVID-19 and its prevention. The data collection tool uploaded to SurveyCTO data collection  
30 system with security patterns. Training with field exercise was given to data collectors to have  
31 common understanding on data collection tools and process. Nine data collectors who had BSc  
32 degree and above and experience in data collection conducted face-to-face interview keeping  
33 COVID-19 prevention measures. Field supervision and online monitoring was done daily to  
34 maintain data quality.  
35  
36  
37  
38  
39  
40  
41  
42

43 Excel file downloaded from SurveyCTO server was exported to SPSS version 25 for data  
44 management. Those respondents with no information about COVID-19 were excluded from main  
45 analysis. Univariate analysis was done to describe variables and binary logistic regression was  
46 performed to identify factors associated with practice.  
47  
48  
49  
50

51 Ethical clearance was obtained from the ethical review committee of the regional health bureau  
52 (Reference number: £'6-19/6193). The study participants were informed about the purpose of the  
53 study and informed verbal consent was taken. All collected data are kept confidential.  
54  
55  
56  
57

## Patient and Public Involvement

Even though respondents were not involved in design, we disseminated the findings to stakeholders working on COVID-19 prevention and control and findings were also disseminated through local media (radio).

## Results

Overall 1239 respondents were included in the study, with response rate of 97.7%. The reason for non-response, mainly, was the fear of COVID-19 transmission during interview.

### Socio-demographic characteristics of respondents

About half, 657 (53%), of respondents were females and about two thirds, 795 (64.2%), were married (Table 1).

Table 1: Socio-demographic characteristics of respondents

| Variables          | Category              | Frequency | Percent |
|--------------------|-----------------------|-----------|---------|
| Sex                | Male                  | 582       | 47.0    |
|                    | Female                | 657       | 53.0    |
| Age                | <=25                  | 304       | 24.5    |
|                    | 26-30                 | 214       | 17.3    |
|                    | 31-35                 | 145       | 11.7    |
|                    | 36-40                 | 148       | 11.9    |
|                    | 41-45                 | 74        | 6.0     |
|                    | 46+                   | 213       | 17.2    |
| Marital status     | I don't know          | 141       | 11.4    |
|                    | Single                | 370       | 29.9    |
|                    | Married               | 795       | 64.2    |
|                    | Divorced              | 36        | 2.9     |
|                    | Widowed               | 31        | 2.5     |
| Educational status | Living separately     | 7         | .6      |
|                    | No formal education   | 126       | 10.2    |
|                    | Primary (1-8)         | 249       | 20.1    |
|                    | Secondary (9-12)      | 375       | 30.3    |
| Occupation         | Certificate and above | 489       | 39.5    |
|                    | Student               | 172       | 13.9    |
|                    | Farmer                | 29        | 2.3     |
|                    | Merchant              | 315       | 25.4    |
|                    | Employee              | 340       | 27.4    |



|             |               |     |      |
|-------------|---------------|-----|------|
|             | House wife    | 208 | 16.8 |
|             | Daily laborer | 42  | 3.4  |
|             | Pensioner     | 30  | 2.4  |
|             | Private       | 52  | 4.2  |
|             | Other         | 51  | 4.1  |
| Family size | ≤ 5           | 858 | 69.2 |
|             | ≥ 6           | 381 | 30.8 |
| Religion    | Orthodox      | 475 | 38.3 |
|             | Protestant    | 594 | 47.9 |
|             | Muslim        | 137 | 11.1 |
|             | Others        | 33  | 2.7  |

### Knowledge about and attitude towards COVID-19

Seven knowledge questions about signs and symptoms, diagnosis of the disease, what to do if there is a suspect, drug to cure the disease, transmission mechanisms, prevention methods and most at risk groups were asked to determine level of knowledge. In summary, the mean score of knowledge was 52.3% (SD=18.9). Knowledge score was categorized using quartile and first quartile was labeled as poor and fourth quartile was labeled good while second and third quartiles were labeled as medium.

Eleven different attitude statements about seriousness of disease, being at risk, possibility of prevention and benefits of staying at health facilities were given to respondents and their agreement to statements was measured using Likert's scale out of five, from strongly disagree to strongly agree. The overall sum of attitude responses showed that mean score was 80.8% (SD=6.48). The overall score was categorized to quartiles and first quartile was considered as negative attitude, second and third quartiles were considered as neutral while fourth quartile was labeled as positive attitude.

### Practice regarding COVID-19 prevention

Nearly nine from 10 (90.3%) and about eight from 10 (82.0%) of respondents reported that they frequently wash hands with soap and/or use sanitizer and keep social distancing as means to prevent COVID-19 respectively. Less than three fifths (57.8%) of respondents wore mask during interview (Figure 1).

1  
2  
3 [Insert Figure 1]  
4  
5

6 Figure 1: Respondents measures to prevent COVID-19, SNNPR, 2020  
7  
8

### 9 **Mask use**

10 About two fifths, 521 (42.2%), were not using any kind of mask during interview. From those who  
11 wore mask, 212 (29.7%) were using medical masks (any kind) while others were using non-  
12 medical masks. Unavailability of mask was the major reason (58.6%) for not wearing mask and  
13 other reasons were presented in Figure 2.  
14  
15  
16  
17

18  
19 [Insert Figure 2]  
20

21 Figure 2: Reasons for not wearing mask, SNNPR, 2020  
22

23 In summary, 605 (48.9%) were practicing social distancing, clean hands and wearing mask.  
24 The practice was highest in Hawassa (88.1%) and lowest in Mizan (9.0%) (Figure 3).  
25  
26  
27

28 [Insert Figure 3]  
29

30 Figure 3: COVID-19 prevention practice among towns, SNNPR, 2020  
31  
32

### 33 **Factors associated with COVID-19 prevention practice**

34 After running multivariate binary logistic regression, sex, educational status, family size and  
35 overall knowledge about COVID-19 were associated with practicing COVID-19 prevention  
36 measures (Table 2).  
37  
38  
39

40 Females were 44% more likely to practice COVID-19 prevention measures as compared to male  
41 respondents (AOR at 95CI: 1.44 (1.08-1.92)). Those who attended primary, secondary and  
42 certificate and above education were 89%, 74% and 89% more likely to practice COVID-19  
43 prevention measures respectively as compared to those who never attended education.  
44  
45  
46  
47

48 Respondents from larger ( $\geq 6$  members) were 39% more likely to practice COVID-19 prevention  
49 measures as compared to those from lesser number of family ( $\leq 6$  members) (AOR at 95%CI: 1.39  
50 (1.04-1.84)).  
51  
52  
53  
54  
55  
56  
57

Respondents who have medium and high level knowledge scores were 2.04 and 2.47 times more likely to practice COVID-19 prevention measures as compared to respondents with poor knowledge scores (AOR at 95%CI: 2.04 (1.51-2.75) and 2.47 (1.80-3.40) respectively.

Table 2: Binary and multivariate binary logistic regression

| Variable           | Category              | Practice COVID-19 prevention |                     | COR 95%CI        | AOR 95%CI        |
|--------------------|-----------------------|------------------------------|---------------------|------------------|------------------|
|                    |                       | No                           | Yes                 |                  |                  |
| Respondent status  | Walking               | 213                          | 192                 | 1                |                  |
|                    | At home               | 418                          | 413                 | 1.09 [0.86-1.39] |                  |
| Sex                | Male                  | 321                          | 261                 | 1                |                  |
|                    | Female                | 310                          | 344                 | 1.36 [1.09-1.71] | 1.44 [1.08-1.92] |
| Marital status     | Single                | 191                          | 179                 |                  |                  |
|                    | Married               | 406                          | 388                 | 1.02 [0.79-1.31] |                  |
|                    | Others                | 34                           | 38                  | 1.19 [0.72-1.98] |                  |
| Educational status | No formal education   | 87                           | 36                  | 1                |                  |
|                    | Primary (1-8)         | 127                          | 122                 | 2.32 [1.46-3.68] | 1.89 [1.10-3.25] |
|                    | Secondary (9-12)      | 192                          | 183                 | 2.30 [1.49-3.57] | 1.74 [1.02-2.98] |
|                    | Certificate and above | 225                          | 264                 | 2.84 [1.85-4.35] | 1.89 [1.07-3.35] |
| Occupation         | Student               | 97                           | 75                  | 1                |                  |
|                    | Farmer                | 25                           | 3                   | 0.15 [0.05-0.53] |                  |
|                    | Merchant              | 154                          | 161                 | 1.35 [0.93-1.97] |                  |
|                    | Employed              | 156                          | 184                 | 1.53 [1.06-2.21] |                  |
|                    | House wife            | 106                          | 100                 | 1.22 [0.81-1.83] |                  |
|                    | Daily laborer         | 32                           | 10                  | 0.40 [0.19-0.87] |                  |
|                    | Pensioner             | 15                           | 15                  | 1.29 [0.59-2.81] |                  |
|                    | Private               | 23                           | 29                  | 1.63 [0.87-3.05] |                  |
| Age category       | Other                 | 23                           | 28                  | 1.57 [0.84-2.95] |                  |
|                    | ≤ 25                  | 171                          | 133                 | 1                |                  |
|                    | 26-30                 | 130                          | 84                  | 0.83 [0.58-1.19] |                  |
|                    | 31-35                 | 81                           | 64                  | 1.02 [0.68-1.51] |                  |
|                    | 36-40                 | 77                           | 70                  | 1.17 [0.79-1.74] |                  |
|                    | 41-45                 | 42                           | 32                  | 0.98 [0.59-1.64] |                  |
|                    | 46+                   | 122                          | 89                  | 0.94 [0.66-1.34] |                  |
| I don't know       | 8                     | 133                          | 21.37 [10.11-45.19] |                  |                  |
| Family size        | ≤ 5                   | 452                          | 404                 | 1                |                  |
|                    | ≥ 6                   | 179                          | 201                 | 1.25 [0.99-1.60] | 1.39 [1.04-1.84] |
| Overall knowledge  | Poor                  | 377                          | 213                 | 1                |                  |
|                    | Medium                | 142                          | 196                 | 2.44 [1.86-3.21] | 2.04 [1.51-2.75] |
|                    | Good                  | 112                          | 196                 | 3.09 [2.33-4.13] | 2.47 [1.80-3.40] |
| Overall attitude   | Negative attitude     | 168                          | 168                 | 1                |                  |
|                    | Neutral               | 277                          | 324                 | 1.17 [0.89-1.53] |                  |
|                    | Positive attitude     | 186                          | 113                 | 0.61 [0.44-0.83] |                  |

## Discussion

This study was done with the objective of assessed practices related to COVID-19 prevention methods and its associated factors and major findings included that only about half of respondents (48.9%) were practicing social distancing, clean hands and wearing mask. Sex, educational status, family size and overall knowledge about COVID-19 were associated with practicing COVID-19 prevention measures.

Nearly nine from 10 (90.3%) and about eight from 10 (82.0%) of respondents reported that they frequently wash hands with soap and/or use sanitizer and keep social distancing as means to prevent COVID-19 respectively. Less than three fifths (57.8%) of respondents wore mask during interview and in summary, only about half (48.9%) of respondents were practicing the three recommended methods (social distancing, clean hands and wearing mask). This result was low as compared to studies done in China [9] that showed practice of more than 95% and Saudi Arabia[8] that showed practice of 75% or more. This less practice as compared to other studies may be due less attention given by the community due to smaller cases in the region.

Respondents who attended primary, secondary and certificate and above education were 89%, 74% and 89% more likely to practice COVID-19 prevention measures respectively as compared to those who never attended education. In addition, respondents who have medium and high level knowledge scores were 2.04 and 2.47 times more likely to practice COVID-19 prevention measures as compared to respondents with poor knowledge scores (AOR at 95%CI: 2.04 (1.51-2.75) and 2.47 (1.80-3.40) respectively. This indicated that level of awareness is important to prevent the disease.

Females were 44% more likely to practice COVID-19 prevention measures as compared to male respondents (AOR at 95CI: 1.44 (1.08-1.92)). Moreover, respondents from larger families ( $\geq 6$  members) were 39% more likely to practice COVID-19 prevention measures as compared to those from lesser number of family size ( $\leq 5$  members) (AOR at 95%CI: 1.39 (1.04-1.84)). This may be due to familial responsibilities to prevent the disease.

Even though this study was conducted early after introduction of the disease to the region, awareness creation has been in place after early detection of the disease in China and declaration of the disease as pandemic. Response activities have been led in organized way by ministry of health and regional health bureaus since introduction of the disease to the country. As part of response, state of emergency

1  
2  
3 was declared and mask use was must in some cases like while using public transport and banks.  
4 Although there were misconceptions about mask use, major reason for not using mask (58.6%) was its  
5 unavailability, which lowered mask use and overall practice among participants. In addition to overall  
6 low practice, there was huge variation of practice ranging from as low as 9% to 88.1%. Improving  
7 access to mask and strengthening awareness creation on mask is crucial.  
8  
9

10  
11  
12 Even though this study covered majority of towns in the region, this study was limited in  
13 addressing smaller towns and rural areas that account for majority of regional population.  
14 Moreover, some of reported practices like social distancing might have been knowledge and may  
15 not be actual practice of respondents due to social desirability bias.  
16  
17  
18  
19  
20

## 21 **Conclusion**

22 COVID-19 prevention practice was low as only about half of participants were practicing social  
23 distancing, clean hands and wear mask. Sex, educational status, family size and overall knowledge  
24 about COVID-19 were associated with practicing COVID-19 prevention measures. Although  
25 awareness creation has been implemented through different medias, it should be strengthened in  
26 different local languages. Concerned government bodies should strictly follow mask use in public  
27 gatherings.  
28  
29  
30  
31  
32  
33

## 34 **Acknowledgements**

35 We would like to thank Dability Inc. for availing free data collection system for COVID-19 survey  
36 as part of its response to tackle the pandemic. Special thanks to Audra E. Blanchfield, SurveyCTO  
37 team member in Dability Inc., for her support by converting community subscription server to  
38 “COVID-19 dedicated server” in the mid of data collection.  
39  
40  
41  
42  
43  
44  
45

## 46 **Contributorship statement**

47 All authors contributed to design and conceptualization. ME developed SurveyCTO form and  
48 followed daily submitted data, managed data, wrote report and manuscript. AK, MH and ES  
49 facilitated financial support. AA reviewed manuscript. All authors read and approved final version.  
50  
51  
52  
53

## 54 **Competing interests**

55 All authors have no competing interest and declare that this study is original article.  
56  
57

## Funding

This study was supported by SNNPR Health Bureau and Public Health Institute (Award number not available). The funder had no role in study design, data collection and analysis, decision to publish, or preparation of the manuscript. Manuscript writing was not supported financially.

## Data sharing statement

All relevant data are within the manuscript. The datasets analyzed during the current study available from the corresponding author on reasonable request.

## References

1. World Health Organization. Investigation of cases of human infection with Middle East respiratory syndrome coronavirus (MERS-CoV): Interim guidance. Geneva, Switzerland: World Health Organization; 2018.
2. The Novel Coronavirus Pneumonia Emergency Response Epidemiology Team. The epidemiological characteristics of an outbreak of 2019 novel coronavirus diseases (COVID-19) in China. *Chin J Epidemiol.* 2020;41:145-51.
3. Federal ministry of health [Ethiopia]. National comprehensive COVID19 management handbook. Addis Ababa: Federal ministry of health [Ethiopia]; 2020
4. World Health Organization. Severe Acute Respiratory Infections Treatment Centre Practical manual to set up and manage a SARI treatment centre and a SARI screening facility in health care facilities. Geneva: World Health Organization; 2020.
5. Alzoubi H, Alnawaiseh N, Al-Mnayyis Aa, Abu- Lubad M, Aqel A, Al-Shagahin H. COVID-19 - Knowledge, Attitude and Practice among Medical and Non-Medical University Students in Jordan. *Journal of Pure and Applied Microbiology.* 2020;14(1):17-24.
6. World Health Organization. Mental health and psychosocial considerations during the COVID-19 outbreak. Geneva: World Health Organization; 2020.
7. Abuya T, Austrian K, Isaac A, Kangwana B, Mbushi F, et al. COVID-19-related knowledge, attitudes, and practices in urban slums in Nairobi, Kenya. *POPULATION COUNCIL*, 2020.
8. Adeleke IT, Adekanye AO, Onawola KA, Okuku AG, Adefemi SA, et al. Data quality assessment in healthcare: a 365-day chart review of inpatients' health records at a Nigerian tertiary hospital. *J Am Med Inform Assoc.* 2012;19.

- 1  
2  
3 9. Vincent Micheal Kiberu, Joseph KB Matovu, Fredrick Makumbi, Carol Kyoziira, Eddie  
4 Mukooyo, Wanyenze RK. Strengthening district-based health reporting through the district  
5 health management information software system: the Ugandan experience. BMC Medical  
6 Informatics and Decision Making. 2014;14(40).  
7  
8  
9  
10  
11  
12  
13  
14  
15  
16  
17  
18  
19  
20  
21  
22  
23  
24  
25  
26  
27  
28  
29  
30  
31  
32  
33  
34  
35  
36  
37  
38  
39  
40  
41  
42  
43  
44  
45  
46  
47  
48  
49  
50  
51  
52  
53  
54  
55  
56  
57  
58  
59  
60

For peer review only

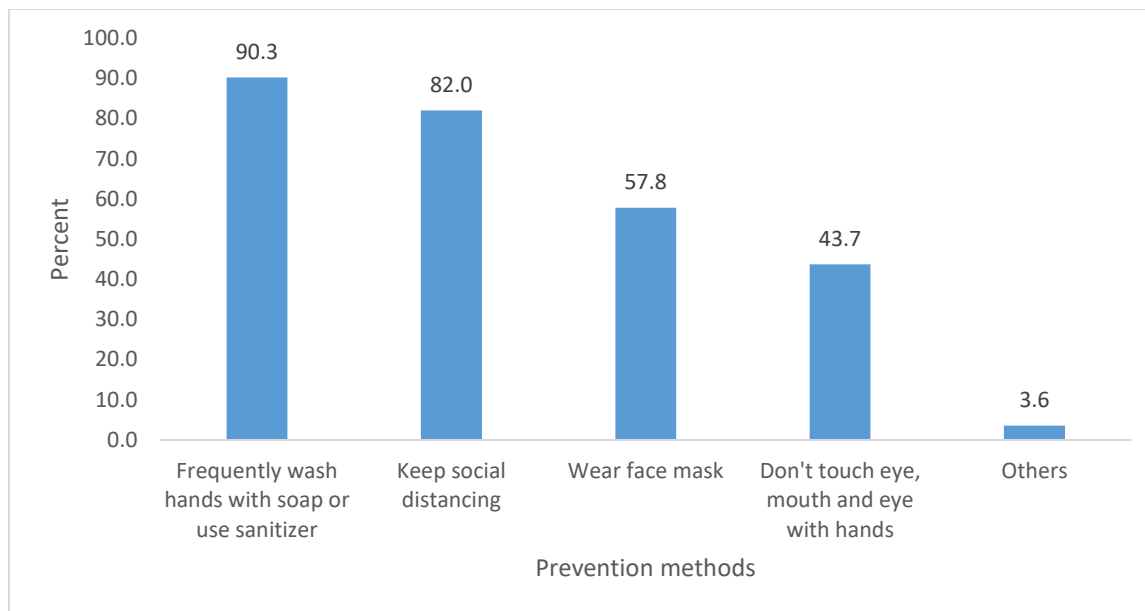

Others\*- cover coughs and sneezes with elbow, wear glove, take hot drinks, keep outdoor clothes out, stopped eating raw food, pray, do sport, frequently check temperature and take vitamin C



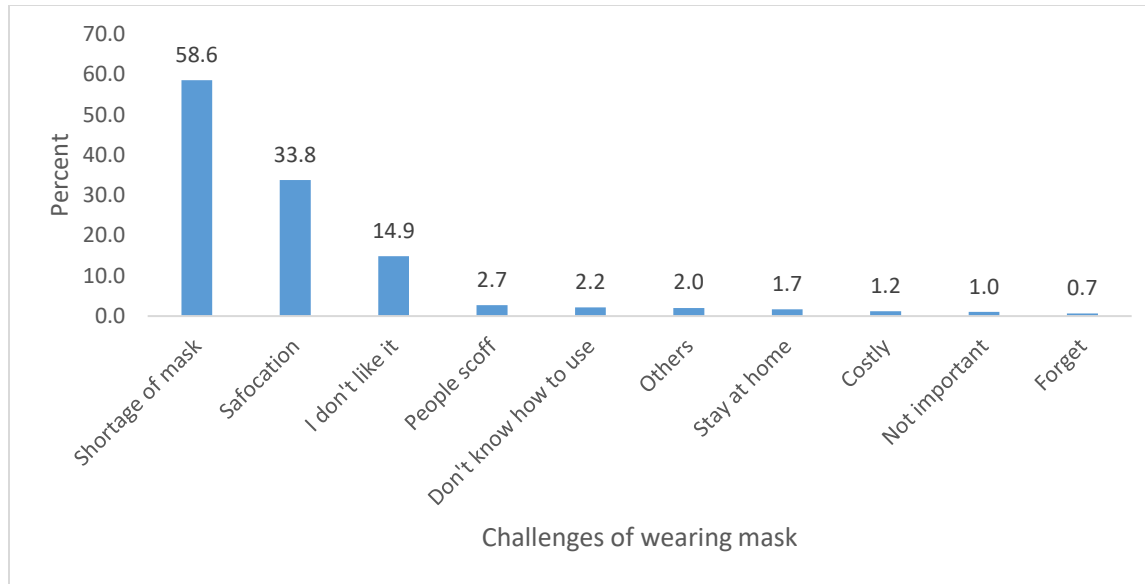

\*-Others: allergy, don't know where to get, hot environment, medical problem, negligence, not sure of quality, think it (itself) brings the disease

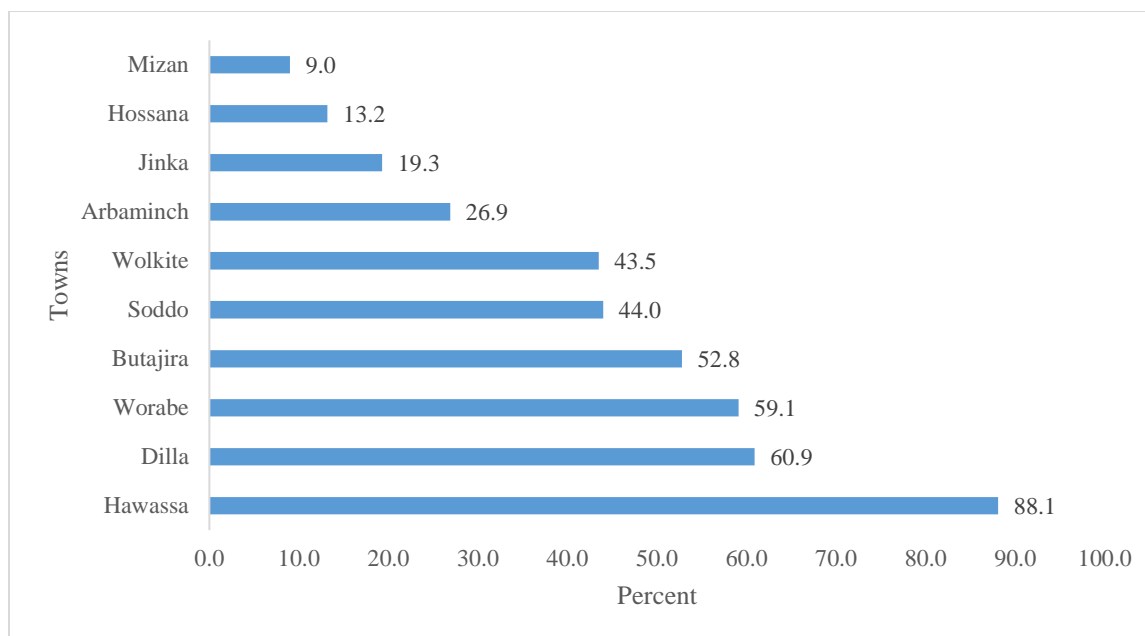

1  
2  
3  
4  
5  
6  
7  
8  
9  
10  
11  
12  
13  
14  
15  
16  
17  
18  
19  
20  
21  
22  
23  
24  
25  
26  
27  
28  
29  
30  
31  
32  
33  
34  
35  
36  
37  
38  
39  
40  
41  
42  
43  
44  
45  
46  
47  
48  
49  
50  
51  
52  
53  
54  
55  
56  
57  
58  
59  
60STROBE Statement—Checklist of items that should be included in reports of *cross-sectional studies*

|                              | Item No | Recommendation                                                                                                                                                                                    | Assessment result** |
|------------------------------|---------|---------------------------------------------------------------------------------------------------------------------------------------------------------------------------------------------------|---------------------|
| <b>Title and abstract</b>    | 1       | (a) Indicate the study's design with a commonly used term in the title or the abstract                                                                                                            | √ (Page 1)          |
|                              |         | (b) Provide in the abstract an informative and balanced summary of what was done and what was found                                                                                               | √ (Page 1)          |
| <b>Introduction</b>          |         |                                                                                                                                                                                                   |                     |
| Background/rationale         | 2       | Explain the scientific background and rationale for the investigation being reported                                                                                                              | √ (Page 3)          |
| Objectives                   | 3       | State specific objectives, including any prespecified hypotheses                                                                                                                                  | √ (Page 3)          |
| <b>Methods</b>               |         |                                                                                                                                                                                                   |                     |
| Study design                 | 4       | Present key elements of study design early in the paper                                                                                                                                           | √ (Page 3)          |
| Setting                      | 5       | Describe the setting, locations, and relevant dates, including periods of recruitment, exposure, follow-up, and data collection                                                                   | √ (Page 3)          |
| Participants                 | 6       | (a) Give the eligibility criteria, and the sources and methods of selection of participants                                                                                                       | √ (Page 4)          |
| Variables                    | 7       | Clearly define all outcomes, exposures, predictors, potential confounders, and effect modifiers. Give diagnostic criteria, if applicable                                                          | √ (Page 4)          |
| Data sources/<br>measurement | 8*      | For each variable of interest, give sources of data and details of methods of assessment (measurement). Describe comparability of assessment methods if there is more than one group              | √ (Page 3)          |
| Bias                         | 9       | Describe any efforts to address potential sources of bias                                                                                                                                         | √ (Page 4)          |
| Study size                   | 10      | Explain how the study size was arrived at                                                                                                                                                         | √ (Page 3)          |
| Quantitative variables       | 11      | Explain how quantitative variables were handled in the analyses. If applicable, describe which groupings were chosen and why                                                                      | √ (Page 4)          |
| Statistical methods          | 12      | (a) Describe all statistical methods, including those used to control for confounding                                                                                                             | √ (Page 4)          |
|                              |         | (b) Describe any methods used to examine subgroups and interactions                                                                                                                               | NA                  |
|                              |         | (c) Explain how missing data were addressed                                                                                                                                                       | NA                  |
|                              |         | (d) If applicable, describe analytical methods taking account of sampling strategy                                                                                                                | NA                  |
|                              |         | (e) Describe any sensitivity analyses                                                                                                                                                             | NA                  |
| <b>Results</b>               |         |                                                                                                                                                                                                   |                     |
| Participants                 | 13*     | (a) Report numbers of individuals at each stage of study—eg numbers potentially eligible, examined for eligibility, confirmed eligible, included in the study, completing follow-up, and analysed | √ (Page 5)          |
|                              |         | (b) Give reasons for non-participation at each stage                                                                                                                                              | √ (Page 5)          |
|                              |         | (c) Consider use of a flow diagram                                                                                                                                                                | X                   |
| Descriptive data             | 14*     | (a) Give characteristics of study participants (eg demographic, clinical, social) and information on exposures and potential confounders                                                          | √ (Page 5)          |
|                              |         | (b) Indicate number of participants with missing data for each variable of interest                                                                                                               | √ (Page 5)          |
| Outcome data                 | 15*     | Report numbers of outcome events or summary measures                                                                                                                                              | √ (Page 7)          |

|    |              |    |                                                                                                                                                                                                                        |
|----|--------------|----|------------------------------------------------------------------------------------------------------------------------------------------------------------------------------------------------------------------------|
| 1  |              |    |                                                                                                                                                                                                                        |
| 2  | Main results | 16 | (a) Give unadjusted estimates and, if applicable, confounder-<br>adjusted estimates and their precision (eg, 95% confidence interval).<br>Make clear which confounders were adjusted for and why they were<br>included |
| 3  |              |    | √ (Page 8)                                                                                                                                                                                                             |
| 4  |              |    |                                                                                                                                                                                                                        |
| 5  |              |    |                                                                                                                                                                                                                        |
| 6  |              |    |                                                                                                                                                                                                                        |
| 7  |              |    |                                                                                                                                                                                                                        |
| 8  |              |    |                                                                                                                                                                                                                        |
| 9  |              |    |                                                                                                                                                                                                                        |
| 10 |              |    |                                                                                                                                                                                                                        |
| 11 |              |    |                                                                                                                                                                                                                        |
| 12 |              |    |                                                                                                                                                                                                                        |
| 13 |              |    |                                                                                                                                                                                                                        |
| 14 |              |    |                                                                                                                                                                                                                        |
| 15 |              |    |                                                                                                                                                                                                                        |
| 16 |              |    |                                                                                                                                                                                                                        |
| 17 |              |    |                                                                                                                                                                                                                        |
| 18 |              |    |                                                                                                                                                                                                                        |
| 19 |              |    |                                                                                                                                                                                                                        |
| 20 |              |    |                                                                                                                                                                                                                        |
| 21 |              |    |                                                                                                                                                                                                                        |
| 22 |              |    |                                                                                                                                                                                                                        |
| 23 |              |    |                                                                                                                                                                                                                        |
| 24 |              |    |                                                                                                                                                                                                                        |
| 25 |              |    |                                                                                                                                                                                                                        |
| 26 |              |    |                                                                                                                                                                                                                        |
| 27 |              |    |                                                                                                                                                                                                                        |
| 28 |              |    |                                                                                                                                                                                                                        |
| 29 |              |    |                                                                                                                                                                                                                        |
| 30 |              |    |                                                                                                                                                                                                                        |
| 31 |              |    |                                                                                                                                                                                                                        |
| 32 |              |    |                                                                                                                                                                                                                        |
| 33 |              |    |                                                                                                                                                                                                                        |
| 34 |              |    |                                                                                                                                                                                                                        |
| 35 |              |    |                                                                                                                                                                                                                        |
| 36 |              |    |                                                                                                                                                                                                                        |
| 37 |              |    |                                                                                                                                                                                                                        |
| 38 |              |    |                                                                                                                                                                                                                        |
| 39 |              |    |                                                                                                                                                                                                                        |
| 40 |              |    |                                                                                                                                                                                                                        |
| 41 |              |    |                                                                                                                                                                                                                        |
| 42 |              |    |                                                                                                                                                                                                                        |
| 43 |              |    |                                                                                                                                                                                                                        |
| 44 |              |    |                                                                                                                                                                                                                        |
| 45 |              |    |                                                                                                                                                                                                                        |
| 46 |              |    |                                                                                                                                                                                                                        |
| 47 |              |    |                                                                                                                                                                                                                        |
| 48 |              |    |                                                                                                                                                                                                                        |
| 49 |              |    |                                                                                                                                                                                                                        |
| 50 |              |    |                                                                                                                                                                                                                        |
| 51 |              |    |                                                                                                                                                                                                                        |
| 52 |              |    |                                                                                                                                                                                                                        |
| 53 |              |    |                                                                                                                                                                                                                        |
| 54 |              |    |                                                                                                                                                                                                                        |
| 55 |              |    |                                                                                                                                                                                                                        |
| 56 |              |    |                                                                                                                                                                                                                        |
| 57 |              |    |                                                                                                                                                                                                                        |
| 58 |              |    |                                                                                                                                                                                                                        |
| 59 |              |    |                                                                                                                                                                                                                        |
| 60 |              |    |                                                                                                                                                                                                                        |

\*Give information separately for exposed and unexposed groups.

**Note:** An Explanation and Elaboration article discusses each checklist item and gives methodological background and published examples of transparent reporting. The STROBE checklist is best used in conjunction with this article (freely available on the Web sites of PLoS Medicine at <http://www.plosmedicine.org/>, Annals of Internal Medicine at <http://www.annals.org/>, and Epidemiology at <http://www.epidem.com/>). Information on the STROBE Initiative is available at [www.strobe-statement.org](http://www.strobe-statement.org).

# BMJ Open

## COVID-19 prevention practices in urban setting during early introduction of the disease: results from community survey in SNNP Region, Ethiopia

|                                 |                                                                                                                                                                                                                                                                                                                                                                                                                                                                                                                                                |
|---------------------------------|------------------------------------------------------------------------------------------------------------------------------------------------------------------------------------------------------------------------------------------------------------------------------------------------------------------------------------------------------------------------------------------------------------------------------------------------------------------------------------------------------------------------------------------------|
| Journal:                        | <i>BMJ Open</i>                                                                                                                                                                                                                                                                                                                                                                                                                                                                                                                                |
| Manuscript ID                   | bmjopen-2020-047373.R1                                                                                                                                                                                                                                                                                                                                                                                                                                                                                                                         |
| Article Type:                   | Original research                                                                                                                                                                                                                                                                                                                                                                                                                                                                                                                              |
| Date Submitted by the Author:   | 01-Mar-2021                                                                                                                                                                                                                                                                                                                                                                                                                                                                                                                                    |
| Complete List of Authors:       | Endriyas, Misganu; Southern Nations Nationalities and Peoples' Region Health Bureau, Health research and technology transfer<br>Kawza, Aknaw; Southern Nations Nationalities and Peoples' Region Health Bureau, Head office<br>Alano, Abraham ; SNNPR President office, SNNPR Policy study and research institute<br>Hussen, Mamush; Southern Nations Nationalities and Peoples' Region Health Bureau, Public health institute<br>Shibru, Endashaw ; Southern Nations Nationalities and Peoples' Region Health Bureau, Public health institute |
| <b>Primary Subject Heading</b>: | Public health                                                                                                                                                                                                                                                                                                                                                                                                                                                                                                                                  |
| Secondary Subject Heading:      | Global health                                                                                                                                                                                                                                                                                                                                                                                                                                                                                                                                  |
| Keywords:                       | Public health < INFECTIOUS DISEASES, COVID-19, HEALTH SERVICES ADMINISTRATION & MANAGEMENT                                                                                                                                                                                                                                                                                                                                                                                                                                                     |
|                                 |                                                                                                                                                                                                                                                                                                                                                                                                                                                                                                                                                |

SCHOLARONE™  
Manuscripts

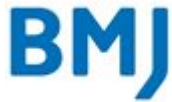

I, the Submitting Author has the right to grant and does grant on behalf of all authors of the Work (as defined in the below author licence), an exclusive licence and/or a non-exclusive licence for contributions from authors who are: i) UK Crown employees; ii) where BMJ has agreed a CC-BY licence shall apply, and/or iii) in accordance with the terms applicable for US Federal Government officers or employees acting as part of their official duties; on a worldwide, perpetual, irrevocable, royalty-free basis to BMJ Publishing Group Ltd ("BMJ") its licensees and where the relevant Journal is co-owned by BMJ to the co-owners of the Journal, to publish the Work in this journal and any other BMJ products and to exploit all rights, as set out in our [licence](#).

The Submitting Author accepts and understands that any supply made under these terms is made by BMJ to the Submitting Author unless you are acting as an employee on behalf of your employer or a postgraduate student of an affiliated institution which is paying any applicable article publishing charge ("APC") for Open Access articles. Where the Submitting Author wishes to make the Work available on an Open Access basis (and intends to pay the relevant APC), the terms of reuse of such Open Access shall be governed by a Creative Commons licence – details of these licences and which [Creative Commons](#) licence will apply to this Work are set out in our licence referred to above.

Other than as permitted in any relevant BMJ Author's Self Archiving Policies, I confirm this Work has not been accepted for publication elsewhere, is not being considered for publication elsewhere and does not duplicate material already published. I confirm all authors consent to publication of this Work and authorise the granting of this licence.

# COVID-19 prevention practices in urban setting during early introduction of the disease: results from community survey in SNNP Region, Ethiopia

Misganu Endriyas, Aknaw Kawza, Abraham Alano, Mamush Hussen, Endashaw Shibru

1. Misganu Endriyas (Corresponding author): Health research and technology directorate, SNNPR Health Bureau, Hawassa, Ethiopia (email – [misganuendrias@yahoo.com](mailto:misganuendrias@yahoo.com))
2. Aknaw Kawza: Head office, SNNPR Health Bureau, Hawassa, Ethiopia (email – [aknak77@gmail.com](mailto:aknak77@gmail.com))
3. Abraham Alano: SNNPR Policy study and research institute, SNNPR President office, Hawassa, Ethiopia (email – [alanoabraham@yahoo.com](mailto:alanoabraham@yahoo.com))
4. Mamush Hussen: Public health institute, SNNPR Health Bureau, Hawassa, Ethiopia (email – [mamushhussen2@gmail.com](mailto:mamushhussen2@gmail.com))
5. Endashaw Shibru: Public health institute, SNNPR Health Bureau, Hawassa, Ethiopia (email – [endash\\_s@yahoo.com](mailto:endash_s@yahoo.com))

## Abstract

**Objective:** To assess community practices related to COVID-19 prevention and its associated factors during early introduction of the disease to the study area.

**Setting and participants:** Community based cross-sectional study was conducted in Southern, Nations, Nationalities and People's Region, Ethiopia. Ten zonal towns with high population density and mobility and 1239 participants were included in the study.

**Outcome measure:** Semi-structured questionnaire was uploaded to SurveyCTO data collection system with security patterns. Mask use was assessed by observation while social distancing and handwashing were assessed by interview. Data were collected by health professionals who have BSc and above and analyzed using SPSS version 25. Descriptive statistics and binary logistic regression were performed.

**Results:** From 1239 individuals, about half, 657 (53%), of respondents were females and about two thirds, 795 (64.2%), were married. Nearly nine out of 10 (90.3%) and about eight out of 10

(82.0%) respondents reported that they frequently wash hands with soap and/or use sanitizer and keep social distancing as means to prevent COVID-19, respectively. Less than three fifths (57.8%) of respondents wore mask during interview. In summary, about half (48.9%) of respondents were practicing the three recommended methods (social distancing, handwashing and wearing mask). Sex, educational status, family size and overall knowledge about COVID-19 were associated with practicing COVID-19 prevention measures.

**Conclusion:** COVID-19 prevention practice was low as only about half of participants were practicing social distancing, handwashing and wearing mask. Although awareness creation has been implemented through different media, it should be strengthened in different local languages. Concerned government bodies should strictly follow mask use in public gatherings.

**Key words:** COVID-19, knowledge, attitude, practice

### **Strengths and limitations of this study**

- Current study was first to cover multi-centers (ten zonal towns) and report regional level COVID-19 prevention practices at community level
- The study could reach to adequate sample in the community during early introduction of the disease to the study setting while there was high fear
- Even though this study covered majority of towns in the region, this study was limited in addressing smaller towns and rural areas that account for majority of regional population
- In addition, though the tool was checked for content and face validity, construct validity was not performed using statistical tests.

### **Introduction**

The Coronavirus disease 2019 (COVID-19) is highly infectious viral disease, and its main clinical symptoms include fever, dry cough, fatigue, myalgia, and dyspnea[1, 2]. COVID-19 as a pandemic continues causing huge social and economic impact and stress on the health care system of all countries in the world[3, 4] though many efforts have been carried out to contain the virus since declaration of the disease as pandemic[5].



1  
2  
3 Prevention of COVID-19 in urban setting of developing countries is challenging because of dense  
4 population, small informal dwellings, lack of access to clean water, multi-generational households  
5 with shared sanitation facilities, high level of social mixing, and transient residents[6, 7]. In  
6 addition, presence of non-specific symptoms of endemic illnesses such as malaria and influenza  
7 in developing countries make it difficult to differentiate from COVID-19 symptoms[6].  
8  
9

10  
11  
12 In Ethiopia, the first case of COVID-19 was registered in March, 2020 and in the study region, it  
13 was registered in early May, 2020. Since then, the ministry of health and regional health bureau in  
14 collaboration with different stakeholders have been doing different activities to prevent and control  
15 the spread of the disease but there was information gap on communities COVID-19 prevention  
16 practices. To assist these responses, this study assessed practices related to COVID-19 prevention  
17 activities and its associated factors in selected zonal towns in Southern, Nations, Nationalities and  
18 People's Region (SNNPR), Ethiopia.  
19  
20  
21  
22  
23  
24  
25  
26

## 27 **Methods**

28  
29  
30 Community based cross sectional study was carried out from May 18 to June 10, 2020 in selected  
31 towns of SNNPR. SNNPR was the third largest region representing nearly 20% population of the  
32 country. The region had more than 56 ethnic groups and languages making it the most diverse  
33 region in the country. The region was administratively sub divided in to 18 zones, one city  
34 administration and seven special woredas. Woreda is administrative structure equivalent to district  
35 with approximately 100000 population. According to the census of 2007, in 2019/2020, the total  
36 population of the region was projected to be about 20.5 million [8].  
37  
38  
39  
40  
41  
42

43 Sample size was estimated using a single population proportion formula at 95% confidence level  
44 assuming proportion of population with good practice to be 50% and considering 5% margin of  
45 error, design effect of three and 10% non-response rate and the final sample size was 1268. The  
46 calculated sample size was allocated to ten zonal towns based on the size of population. Ten towns  
47 were purposely selected considering potential risk of COVID-19, crowdedness and high mobility.  
48  
49  
50

51  
52 At the time of data collection, the country declared state of emergency that was not strict and some  
53 people were moving in towns while majority stay at home. To include both population staying at  
54  
55  
56  
57

1  
2  
3 home and out of home, one-third of estimated sample size was allocated to out of home population  
4 in towns and the rest two-thirds were allocated to population staying at home.

5  
6 In study setting, towns are structured to the smallest administrative unit, kebeles. Kebeles in the  
7 towns were listed and two sample kebeles were selected randomly from each town. To select  
8 individual respondents, data collectors went to the center of selected kebeles and pin pen to select  
9 the direction to start first house. The next household was selected from next adjacent block in  
10 parallel position and continued until sample size was fulfilled. Concerning out of home population,  
11 every other person that data collectors met while moving to next block were selected and  
12 interviewed and continued until sample size was fulfilled. Residing in the selected kebeles for at  
13 least for six months and age above 18 years were considered as eligibility criteria.  
14  
15  
16  
17  
18  
19  
20

21 The questionnaire (Supplementary file1) was prepared by reviewing relevant literatures [7, 9, 10].  
22 The tool consisted socio-demographic characteristics, exposure to COVID-19 messages and  
23 knowledge, attitude and practice about COVID-19 and its prevention. Almost all questions had  
24 “others” options and space to type other responses. The prepared tool was then shared with  
25 members of Emergency Operation Center (EOC) of COVID-19 response at regional level and  
26 Hawassa University Scientific Advisory Committee (SAC) to address face and content validity of  
27 questionnaire and to understand that questions can capture required data. EOC consists experts  
28 from regional health bureau, local and international partners working on COVID-response,  
29 Hawassa Health Science College and Hawassa University. The questionnaire was initially  
30 prepared in English, and then translated to Amharic parallelly by investigators that comprise  
31 different public health experts and complemented for better version. The data collection tool was  
32 then uploaded to SurveyCTO data collection system with security patterns. Training was given to  
33 data collectors to have common understanding on data collection tools and process. Tool pretest  
34 was done in urban settings not included in actual study to familiarize data collectors and to test if  
35 there were any challenges during interview and modifications were made based on field feedbacks.  
36  
37 Nine data collectors who had BSc degree and above and experience in data collection conducted  
38 face-to-face interview keeping COVID-19 prevention measures like social distancing and wearing  
39 mask. Field supervision and online monitoring was done daily to maintain data quality.  
40  
41  
42  
43  
44  
45  
46  
47  
48  
49  
50  
51  
52

53 Excel file downloaded from SurveyCTO server was exported to SPSS version 25 for data  
54 management. Those respondents with no information about COVID-19 were excluded from main  
55  
56  
57

analysis. Descriptive statistics (like frequency, percentages, mean and standard deviation) were used to describe study participants and variables. Potential predictors of practice were determined using binary logistic regression. Independent variables with p-value of less than 0.20 during bivariate binary logistic regression analysis were included in multivariate binary logistic regression model. Finally, variables with p-value of less than 0.05 during multivariate binary logistic regression were considered to have statistically significant association and were reported with adjusted odds ratio (AOR) and 95%CI.

Ethical clearance was obtained from the ethical review committee of the regional health bureau (Reference number: £'6-19/6193). The study participants were informed about the purpose of the study and informed verbal consent was taken. Verbal consent was preferred and approved because of its popularity in the study setting and to minimize contamination during the pandemic. All collected data are kept confidential.

### **Patient and Public Involvement**

Even though respondents were not involved in design, we disseminated the findings to stakeholders working on COVID-19 prevention and control and findings were also disseminated through local media.

## **Results**

Overall 1239 respondents were included in the study, with response rate of 97.7%. The reason for non-response, mainly, was the fear of COVID-19 transmission during interview.

### **Socio-demographic characteristics of respondents**

About half, 657 (53%), of respondents were females and about two thirds, 795 (64.2%), were married (Table 1).

Table 1: Socio-demographic characteristics of respondents

| <b>Variables</b> | <b>Category</b> | <b>Frequency</b> | <b>Percent</b> |
|------------------|-----------------|------------------|----------------|
| Sex              | Male            | 582              | 47.0           |
|                  | Female          | 657              | 53.0           |
| Age              | ≤ 25            | 304              | 24.5           |

|                    |                       |     |      |
|--------------------|-----------------------|-----|------|
|                    | 26-30                 | 214 | 17.3 |
|                    | 31-35                 | 145 | 11.7 |
|                    | 36-40                 | 148 | 11.9 |
|                    | 41-45                 | 74  | 6.0  |
|                    | 46+                   | 213 | 17.2 |
|                    | I don't know          | 141 | 11.4 |
| Marital status     | Single                | 370 | 29.9 |
|                    | Married               | 795 | 64.2 |
|                    | Divorced              | 36  | 2.9  |
|                    | Widowed               | 31  | 2.5  |
|                    | Living separately     | 7   | .6   |
| Educational status | No formal education   | 126 | 10.2 |
|                    | Primary (1-8)         | 249 | 20.1 |
|                    | Secondary (9-12)      | 375 | 30.3 |
|                    | Certificate and above | 489 | 39.5 |
| Occupation         | Student               | 172 | 13.9 |
|                    | Farmer                | 29  | 2.3  |
|                    | Merchant              | 315 | 25.4 |
|                    | Employee              | 340 | 27.4 |
|                    | House wife            | 208 | 16.8 |
|                    | Daily laborer         | 42  | 3.4  |
|                    | Pensioner             | 30  | 2.4  |
|                    | Private               | 52  | 4.2  |
|                    | Other                 | 51  | 4.1  |
| Family size        | ≤ 5                   | 858 | 69.2 |
|                    | ≥ 6                   | 381 | 30.8 |
| Religion           | Orthodox              | 475 | 38.3 |
|                    | Protestant            | 594 | 47.9 |
|                    | Muslim                | 137 | 11.1 |
|                    | Others                | 33  | 2.7  |

### Knowledge about and attitude towards COVID-19

Seven knowledge questions about signs and symptoms, diagnosis of the disease, what to do if there is a suspect, drug to cure the disease, transmission mechanisms, prevention methods and most at risk groups were asked to determine level of knowledge. In summary, the mean score of knowledge was 52.3% (SD=18.9). Knowledge score was categorized using quartile and first quartile was labeled as poor and fourth quartile was labeled good while second and third quartiles were labeled as medium.

1  
2  
3 Eleven different attitude statements about seriousness of disease, being at risk, possibility of  
4 prevention and benefits of staying at health facilities were given to respondents and their agreement  
5 to statements was measured using Likert's scale out of five, from strongly disagree to strongly  
6 agree. The overall sum of attitude responses showed that mean score was 80.8% (SD=6.48). The  
7 overall score was categorized to quartiles and first quartile was considered as negative attitude,  
8 second and third quartiles were considered as neutral while fourth quartile was labeled as positive  
9 attitude.

### 16 **Practice regarding COVID-19 prevention**

17  
18 Nearly nine from 10 (90.3%) and about eight from 10 (82.0%) of respondents reported that they  
19 frequently wash hands with soap and/or use sanitizer and keep social distancing as means to  
20 prevent COVID-19 respectively. Less than three fifths (57.8%) of respondents wore mask during  
21 interview (Figure 1).  
22  
23

24 [Insert Figure 1]

25  
26  
27  
28 Figure 1: Respondents measures to prevent COVID-19, SNNPR, 2020  
29  
30

### 31 **Mask use**

32  
33 About two fifths, 521 (42.2%), were not using any kind of mask during interview. From those who  
34 wore mask, 212 (29.7%) were using medical masks (any kind) while others were using non-  
35 medical masks. Unavailability of mask was the major reason (58.6%) for not wearing mask and  
36 other reasons were presented in Figure 2.  
37  
38  
39

40 [Insert Figure 2]

41  
42  
43 Figure 2: Reasons for not wearing mask, SNNPR, 2020  
44  
45

46 In summary, 605 (48.9%) were practicing social distancing, clean hands and wearing mask.

47 The practice was highest in Hawassa (88.1%) and lowest in Mizan (9.0%) (Figure 3).  
48  
49

50 [Insert Figure 3]

51  
52  
53 Figure 3: COVID-19 prevention practice among towns, SNNPR, 2020  
54  
55  
56  
57

## Factors associated with COVID-19 prevention practice

After running multivariate binary logistic regression, sex, educational status, family size and overall knowledge about COVID-19 were associated with practicing COVID-19 prevention measures (Table 2).

Females were 44% more likely to practice COVID-19 prevention measures as compared to male respondents (AOR at 95CI: 1.44 (1.08-1.92)). Those who attended primary, secondary and certificate and above education were 89%, 74% and 89% more likely to practice COVID-19 prevention measures respectively as compared to those who never attended education.

Respondents from larger ( $\geq 6$  members) were 39% more likely to practice COVID-19 prevention measures as compared to those from lesser number of family ( $\leq 5$  members) (AOR at 95%CI: 1.39 (1.04-1.84)).

Respondents who have medium and high level knowledge scores were 2.04 and 2.47 times more likely to practice COVID-19 prevention measures as compared to respondents with poor knowledge scores (AOR at 95%CI: 2.04 (1.51-2.75) and 2.47 (1.80-3.40) respectively).

Table 2: Binary and multivariate binary logistic regression

| Variable           | Category              | Practice COVID-19 prevention |     | COR 95%CI        | AOR 95%CI        |
|--------------------|-----------------------|------------------------------|-----|------------------|------------------|
|                    |                       | No                           | Yes |                  |                  |
| Respondent status  | Walking               | 213                          | 192 | 1                |                  |
|                    | At home               | 418                          | 413 | 1.09 [0.86-1.39] |                  |
| Sex                | Male                  | 321                          | 261 | 1                |                  |
|                    | Female                | 310                          | 344 | 1.36 [1.09-1.71] | 1.44 [1.08-1.92] |
| Marital status     | Single                | 191                          | 179 |                  |                  |
|                    | Married               | 406                          | 388 | 1.02 [0.79-1.31] |                  |
|                    | Others                | 34                           | 38  | 1.19 [0.72-1.98] |                  |
| Educational status | No formal education   | 87                           | 36  | 1                |                  |
|                    | Primary (1-8)         | 127                          | 122 | 2.32 [1.46-3.68] | 1.89 [1.10-3.25] |
|                    | Secondary (9-12)      | 192                          | 183 | 2.30 [1.49-3.57] | 1.74 [1.02-2.98] |
|                    | Certificate and above | 225                          | 264 | 2.84 [1.85-4.35] | 1.89 [1.07-3.35] |
| Occupation         | Student               | 97                           | 75  | 1                |                  |
|                    | Farmer                | 25                           | 3   | 0.15 [0.05-0.53] |                  |
|                    | Merchant              | 154                          | 161 | 1.35 [0.93-1.97] |                  |
|                    | Employed              | 156                          | 184 | 1.53 [1.06-2.21] |                  |
|                    | House wife            | 106                          | 100 | 1.22 [0.81-1.83] |                  |
|                    | Daily laborer         | 32                           | 10  | 0.40 [0.19-0.87] |                  |
|                    | Pensioner             | 15                           | 15  | 1.29 [0.59-2.81] |                  |

|                   |                   |     |     |                     |                  |
|-------------------|-------------------|-----|-----|---------------------|------------------|
|                   | Private           | 23  | 29  | 1.63 [0.87-3.05]    |                  |
|                   | Other             | 23  | 28  | 1.57 [0.84-2.95]    |                  |
| Age category      | ≤ 25              | 171 | 133 | 1                   |                  |
|                   | 26-30             | 130 | 84  | 0.83 [0.58-1.19]    |                  |
|                   | 31-35             | 81  | 64  | 1.02 [0.68-1.51]    |                  |
|                   | 36-40             | 77  | 70  | 1.17 [0.79-1.74]    |                  |
|                   | 41-45             | 42  | 32  | 0.98 [0.59-1.64]    |                  |
|                   | 46+               | 122 | 89  | 0.94 [0.66-1.34]    |                  |
|                   | I don't know      | 8   | 133 | 21.37 [10.11-45.19] |                  |
| Family size       | ≤ 5               | 452 | 404 | 1                   |                  |
|                   | ≥ 6               | 179 | 201 | 1.25 [0.99-1.60]    | 1.39 [1.04-1.84] |
| Overall knowledge | Poor              | 377 | 213 | 1                   |                  |
|                   | Medium            | 142 | 196 | 2.44 [1.86-3.21]    | 2.04 [1.51-2.75] |
|                   | Good              | 112 | 196 | 3.09 [2.33-4.13]    | 2.47 [1.80-3.40] |
| Overall attitude  | Negative attitude | 168 | 168 | 1                   |                  |
|                   | Neutral           | 277 | 324 | 1.17 [0.89-1.53]    |                  |
|                   | Positive attitude | 186 | 113 | 0.61 [0.44-0.83]    |                  |

## Discussion

This study was done with the objective of assessing practices related to COVID-19 prevention methods and its associated factors and the major finding was that only about half of respondents (48.9%) were practicing social distancing, clean hands and wearing mask. Sex, educational status, family size and overall knowledge about COVID-19 were associated with practicing COVID-19 prevention measures.

Nearly nine from 10 (90.3%) and about eight from 10 (82.0%) of respondents reported that they frequently wash hands with soap and/or use sanitizer and keep social distancing as means to prevent COVID-19, respectively. Less than three fifths (57.8%) of respondents wore mask during interview and in summary, only about half (48.9%) of respondents were practicing the three recommended methods (social distancing, clean hands and wearing mask). This result was low as compared to studies done in China [10] that showed practice of more than 95% and Saudi Arabia [9] that showed practice of 75% or more. This less practice as compared to other studies may be due less attention given by the community due to smaller (less than hundred) cases in the region.

Respondents who attended primary, secondary and certificate and above education were 89%, 74% and 89% more likely to practice COVID-19 prevention measures respectively as compared to those

1  
2  
3 who never attended education. In addition, respondents who have medium and high level knowledge  
4 scores were 2.04 and 2.47 times more likely to practice COVID-19 prevention measures as compared  
5 to respondents with poor knowledge scores (AOR at 95%CI: 2.04 (1.51-2.75) and 2.47 (1.80-3.40)  
6 respectively. The level of education was also reported as significant factor in the study conducted in  
7 Sidama and Tigray regions of Ethiopia [11, 12]. Moreover, study done in South West Ethiopia [13],  
8 Tigray [12] and Palestine [14] added that level of knowledge is significant factor of COVID-19  
9 prevention. This indicated that level of awareness is important to prevent the disease.

10  
11  
12 Females were 44% more likely to practice COVID-19 prevention measures as compared to male  
13 respondents (AOR at 95CI: 1.44 (1.08-1.92)). Moreover, respondents from larger families ( $\geq 6$   
14 members) were 39% more likely to practice COVID-19 prevention measures as compared to those  
15 from lesser number of family size ( $\leq 5$  members) (AOR at 95%CI: 1.39 (1.04-1.84)). Similar finding  
16 was reported by a study done in South West Ethiopia [13]. This may be due to familial responsibilities  
17 to prevent the disease and opportunities to discuss about the disease.

18  
19  
20 Even though this study was conducted early after introduction of the disease to the region, awareness  
21 creation has been in place after early detection of the disease in China and declaration of the disease  
22 as pandemic. Response activities have been led in organized way by ministry of health and regional  
23 health bureaus since introduction of the disease to the country. As part of response, state of emergency  
24 was declared and mask use was must in some cases like while using public transport and banks.  
25 Although there were misconceptions about mask use, major reason for not using mask (58.6%) was its  
26 unavailability, which lowered mask use and overall practice among participants. In addition to overall  
27 low practice, there was huge variation of practice ranging from as low as 9% to 88.1%. Improving  
28 access to mask and strengthening awareness creation on mask is crucial.

29  
30  
31 Because of the urgency of information needed during early introduction of the pandemic to the  
32 study area, the tool used was limited as we did not validate it using statistical tests. Even though  
33 this study covered majority of towns in the region, this study was limited in addressing smaller  
34 towns and rural areas that account for majority of regional population. In addition, though we  
35 included respondents staying at home and those moving in towns, the sample size allocation may  
36 not exactly represent respective population segment. Moreover, some of reported practices like  
37 social distancing might have been knowledge and may not be actual practice of respondents due  
38 to social desirability bias.



## Conclusion

COVID-19 prevention practice was low as only about half of participants were practicing social distancing, clean hands and wear mask. Sex, educational status, family size and overall knowledge about COVID-19 were associated with practicing COVID-19 prevention measures. Although awareness creation has been implemented through different medias, it should be strengthened in different local languages. Concerned government bodies should strictly follow mask use in public gatherings.

## Acknowledgements

We would like to thank Dobility Inc. for availing free data collection system for COVID-19 survey as part of its response to tackle the pandemic. Special thanks to Audra E. Blanchfield, SurveyCTO team member in Dobility Inc., for her support by converting community subscription server to “COVID-19 dedicated server” in the mid of data collection.

## Contributorship statement

All authors contributed to conceptualization, design and data collection. ME developed SurveyCTO form and followed daily submitted data, managed data, wrote report and manuscript. AK, MH and ES facilitated financial support and managed overall survey. AA reviewed manuscript. All authors read and approved final version.

## Competing interests

All authors have no competing interest and declare that this study is original article.

## Funding

This study was supported by SNNPR Health Bureau and Public Health Institute (Award number not available). The funder had no role in study design, data collection and analysis, decision to publish, or preparation of the manuscript. Manuscript writing was not supported financially.

## Data sharing statement

All relevant data are within the manuscript. The datasets analyzed during the current study available from the corresponding author on reasonable request.

## Supplementary file

1  
2  
3 SNNPR COVID-19 tool (English)  
4  
5  
6  
7

## 8 **References**

- 9  
10  
11 1. World Health Organization. Investigation of cases of human infection with Middle East  
12 respiratory syndrome coronavirus (MERS-CoV): Interim guidance. Geneva, Switzerland:  
13 World Health Organization; 2018.  
14
- 15  
16 2. The Novel Coronavirus Pneumonia Emergency Response Epidemiology Team. The  
17 epidemiological characteristics of an outbreak of 2019 novel coronavirus diseases (COVID-  
18 19) in China. *Chin J Epidemiol.* 2020;41:145-51.  
19
- 20  
21 3. Federal ministry of health [Ethiopia]. National comprehensive COVID19 management  
22 handbook. Addis Ababa: Federal ministry of health [Ethiopia]; 2020  
23
- 24  
25 4. World Health Organization. Severe Acute Respiratory Infections Treatment Centre Practical  
26 manual to set up and manage a SARI treatment centre and a SARI screening facility in health  
27 care facilities. Geneva: World Health Organization; 2020.  
28
- 29  
30 5. Alzoubi H, Alnawaiseh N, Al-Mnayyis Aa, Abu- Lubad M, Aqel A, Al-Shagahin H.  
31 COVID-19 - Knowledge, Attitude and Practice among Medical and Non-Medical University  
32 Students in Jordan. *Journal of Pure and Applied Microbiology.* 2020;14(1):17-24.  
33
- 34  
35 6. World Health Organization. Mental health and psychosocial considerations during the  
36 COVID-19 outbreak. Geneva: World Health Organization; 2020.  
37
- 38  
39 7. Abuya T, Austrian K, Isaac A, Kangwana B, Mbushi F, et al. COVID-19-related knowledge,  
40 attitudes, and practices in urban slums in Nairobi, Kenya. *POPULATION COUNCIL*, 2020.  
41
- 42  
43 8. SNNPR Regional Health Bureau. Annual plan of 2019/2020. SNNPR Regional Health  
44 Bureau; 2020.  
45
- 46  
47 9. ALdowyan NM, Ahmed AS, El-Gharabawy RM. Knowledge, Attitude and Practice (KAP)  
48 Study about Middle East Respiratory Syndrome Coronavirus (MERS-CoV) among  
49 Population in Saudi Arabia. *International Archives of Medicine.* 2020;10(254).  
50
- 51  
52 10. Zhong B-L, Luo W, Li H-M, Zhang Q-Q, Liu X-G, et al. Knowledge, attitudes, and practices  
53 towards COVID-19 among Chinese residents during the rapid rise period of the COVID-19  
54  
55  
56  
57  
58  
59  
60

1  
2  
3 outbreak: a quick online cross-sectional survey. *International Journal of Biological Sciences*.  
4 2020;16(10).  
5

- 6  
7 11. Yoseph A, Tamiso A, Ejeso A. Knowledge, attitudes, and practices related to COVID-19  
8 pandemic among adult population in Sidama Regional State, Southern Ethiopia: A  
9 community based cross-sectional study. *PLoS One*. 2021;16(1):e0246283.  
10  
11 12. Haftom M, Petrucka P, Gemechu K, Mamo H, Tsegay T, et al. Knowledge, Attitudes, and  
12 Practices Towards COVID-19 Pandemic Among Quarantined Adults in Tigray Region,  
13 Ethiopia. *Infect Drug Resist*. 2020;13:3727-37.  
14  
15 13. Wondimu W, Ejigu A, Ayenew M, Kidnau AW, Niguse W, et al. Factors Associated with  
16 Coronavirus Disease 2019 Prevention Practices in Three Zones of Southwest Ethiopia:  
17 Community-Based Cross-Sectional Study. *Int J Gen Med*. 2020;13:1603-11.  
18  
19 14. Qutob N, Awartani F. Knowledge, attitudes and practices (KAP) towards COVID-19 among  
20 Palestinians during the COVID-19 outbreak: A cross-sectional survey. *PLoS One*.  
21 2021;16(1):e0244925.  
22  
23  
24  
25  
26  
27  
28  
29  
30  
31  
32  
33  
34  
35  
36  
37  
38  
39  
40  
41  
42  
43  
44  
45  
46  
47  
48  
49  
50  
51  
52  
53  
54  
55  
56  
57  
58  
59  
60

1  
2  
3  
4  
5  
6  
7  
8  
9  
10  
11  
12  
13  
14  
15  
16  
17  
18  
19  
20  
21  
22  
23  
24  
25  
26  
27  
28  
29  
30  
31  
32  
33  
34  
35  
36  
37  
38  
39  
40  
41  
42  
43  
44  
45  
46  
47  
48  
49  
50  
51  
52  
53  
54  
55  
56  
57  
58  
59  
60

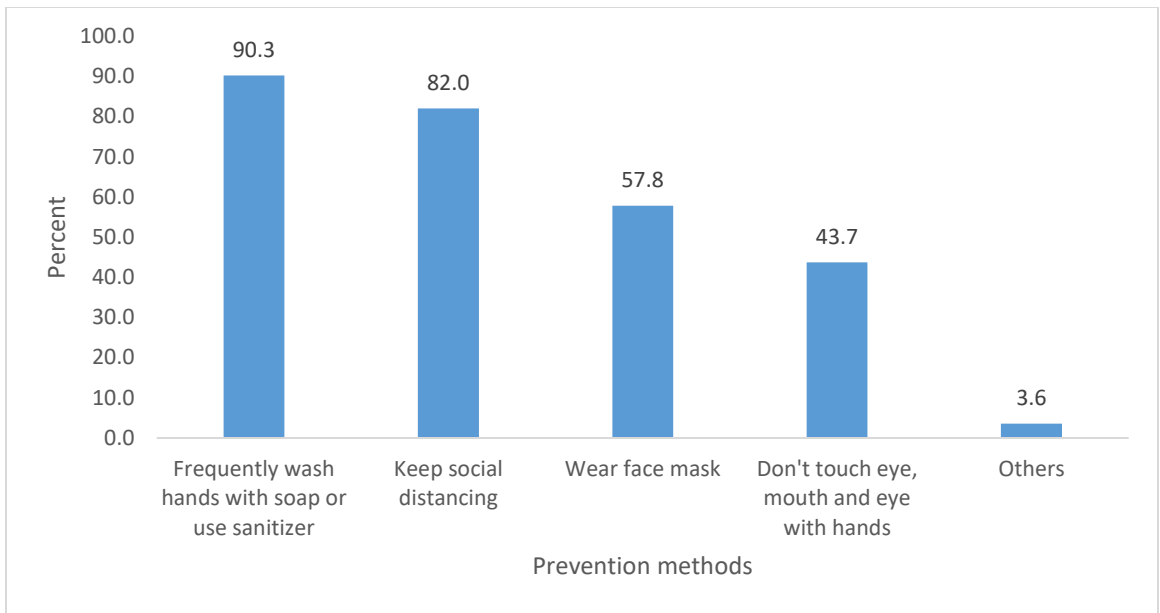

Others\*- cover coughs and sneezes with elbow, wear glove, take hot drinks, keep outdoor clothes out, stopped eating raw food, pray, do sport, frequently check temperature and take vitamin C

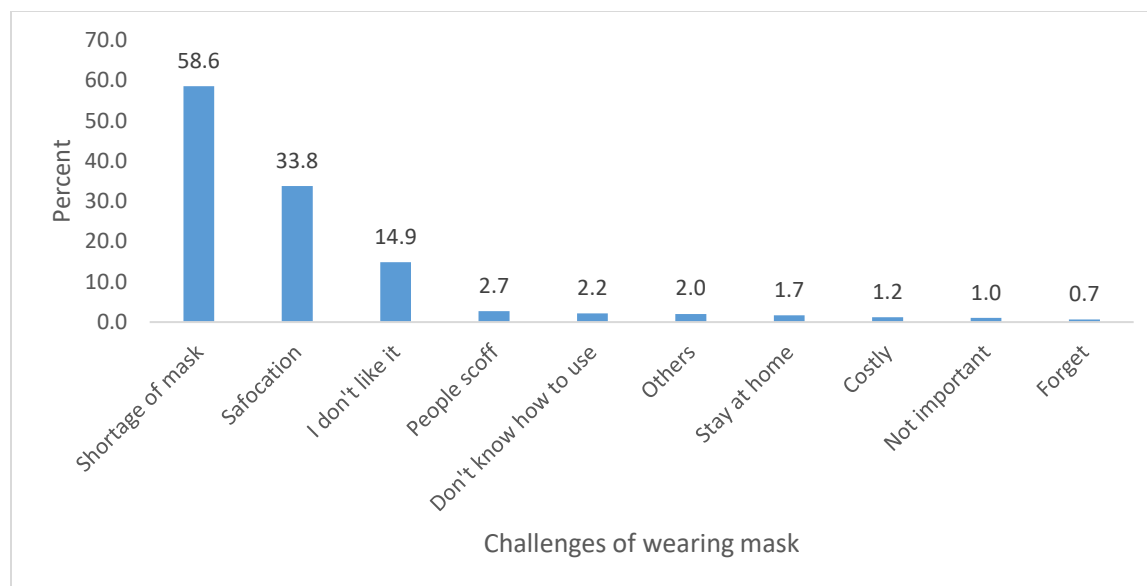

\*-Others: allergy, don't know where to get, hot environment, medical problem, negligence, not sure of quality, think it (itself) brings the disease

1  
2  
3  
4  
5  
6  
7  
8  
9  
10  
11  
12  
13  
14  
15  
16  
17  
18  
19  
20  
21  
22  
23  
24  
25  
26  
27  
28  
29  
30  
31  
32  
33  
34  
35  
36  
37  
38  
39  
40  
41  
42  
43  
44  
45  
46  
47  
48  
49  
50  
51  
52  
53  
54  
55  
56  
57  
58  
59  
60

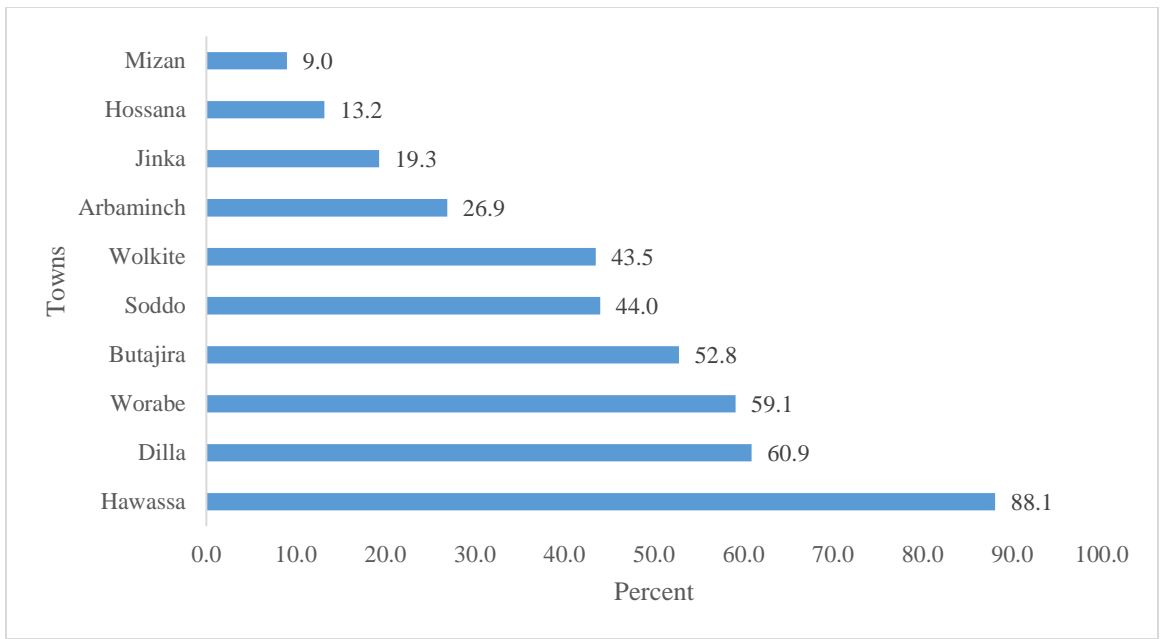

Peer review only

**Tool for assessment of knowledge, attitude and practice related to COVID-19 and its prevention in SNNPR, Ethiopia**

Town \_\_\_\_\_

Interviewee status: 1. Walking                      2. Staying at home

Good day! My name is \_\_\_\_\_. SNNNP regional health bureau is performing a lot of activities to prevent and control COVID-19 pandemic. Now, the bureau is conducting a research on knowledge and attitude of residents towards COVID-19 to help it in planning for the disease prevention and control and am here to collect the data for this study.

We don't collect personal identifiers and all your responses are confidential. Your participation is voluntary and you have right to leave at any time and also skip any question you don't want to answer.

Are you willing to participate in the interview?

1. Yes → Go to question 1
2. No → Finish the interview

|    | Question                                                                                      | Response                                                                                                                                                                                                      | Skip   |
|----|-----------------------------------------------------------------------------------------------|---------------------------------------------------------------------------------------------------------------------------------------------------------------------------------------------------------------|--------|
|    | <b>Knowledge</b>                                                                              |                                                                                                                                                                                                               |        |
| 1. | Have you heard about COVID-19?                                                                | 1. Yes<br>2. No                                                                                                                                                                                               | 2 → 38 |
| 2. | If yes, what is/are your sources of information?<br>(MULTIPLE RESPONSES, DO NOT READ OPTIONS) | 1. Radio<br>2. Television<br>3. Social media<br>4. Ethio telecom<br>5. Leaflet<br>6. Health workers<br>7. Community meetings<br>8. Friends<br>9. Family members<br>10. School<br>11. Other (Specify)<br>_____ |        |
| 3. | Do you know signs and symptoms of COVID-19?                                                   | 1. Yes<br>2. No                                                                                                                                                                                               | 2 → 5  |
| 4. | If yes, what are signs and symptoms of COVID-19?<br>(MULTIPLE RESPONSES, DO NOT READ OPTIONS) | 1. Fever<br>2. Cough<br>3. Difficulties in breathing<br>4. Tiredness<br>5. Chest pain                                                                                                                         |        |

|     |                                                                                                                                  |                                                                                                                                                                                                                     |        |
|-----|----------------------------------------------------------------------------------------------------------------------------------|---------------------------------------------------------------------------------------------------------------------------------------------------------------------------------------------------------------------|--------|
|     |                                                                                                                                  | 6. Other (Specify)<br>_____                                                                                                                                                                                         |        |
| 5.  | How we can confirm that a person has COVID-19?                                                                                   | 1. By signs and symptoms<br>2. By lab test<br>3. Impossible<br>4. Other (Specify)<br>_____                                                                                                                          |        |
| 6.  | What should be done if there is a suspect of COVID-19?<br>(MULTIPLE RESPONSES, DO NOT READ OPTIONS)                              | 1. Report to health facilities<br>2. Isolate at home<br>3. Give traditional medicine (spices)<br>4. Take to holy water<br>5. Take to religious organization<br>6. Give anointing oil<br>7. Other (Specify)<br>_____ |        |
| 7.  | I pray not to happen, but what would you do if have signs and symptoms of COVID-19?<br>(MULTIPLE RESPONSES, DO NOT READ OPTIONS) | 1. Go to health facilities<br>2. Isolate myself at home<br>3. Take traditional medicine (spices)<br>4. Go to holy water<br>5. Go to religious organization<br>6. Take anointing oil<br>7. Other (Specify)<br>_____  |        |
| 8.  | Is there drug to cure COVID-19?                                                                                                  | 1. Yes<br>2. No                                                                                                                                                                                                     | 2 → 10 |
| 9.  | If yes, what is the drug to cure COVID-19?                                                                                       | 1. Modern medicine (any list)<br>2. Traditional medicine (spices)<br>3. Holy water<br>4. Taking to religious organization (praying)<br>5. Anointing oil<br>6. Other (Specify)<br>_____                              |        |
| 10. | Is COVID-19 transmissible person to person?                                                                                      | 1. Yes<br>2. No                                                                                                                                                                                                     | 2 → 12 |
| 11. | If yes, how it is transmitted from person to person?<br>(MULTIPLE RESPONSES, DO NOT READ OPTIONS)                                | 1. Touching eye, mouth and/or nose with unclean hands<br>2. Being within 2 meter distance with infected person<br>3. Other (Specify)<br>_____                                                                       |        |



|     |                                                                                                                                                                            |                                                                                                                                                                                                                                                                              |  |
|-----|----------------------------------------------------------------------------------------------------------------------------------------------------------------------------|------------------------------------------------------------------------------------------------------------------------------------------------------------------------------------------------------------------------------------------------------------------------------|--|
| 12. | What one should do to prevent COVID-19 transmission?<br>(MULTIPLE RESPONSES, DO NOT READ OPTIONS)                                                                          | <ol style="list-style-type: none"> <li>1. Keeping social distancing</li> <li>2. Washing hands with soap or using sanitizer</li> <li>3. Not touching eye, nose and/or mouth with unclean hands</li> <li>4. Wearing face mask</li> <li>5. Other (Specify)<br/>_____</li> </ol> |  |
| 13. | What are groups of people that are most at risk of COVID-19?<br>(MULTIPLE RESPONSES, DO NOT READ OPTIONS)                                                                  | <ol style="list-style-type: none"> <li>1. Old ages</li> <li>2. People with underlying diseases like diabetes, cancer etc.</li> <li>3. Highly exposed groups (like health workers, caregivers, mobile groups)</li> <li>4. Other (Specify)<br/>_____</li> </ol>                |  |
|     | <b>Attitude</b>                                                                                                                                                            |                                                                                                                                                                                                                                                                              |  |
|     | Now, I'll read some statements about COVID-19. Tell me your degree of agreement to the statements by saying strongly agree, agree, neutral, disagree or strongly disagree. |                                                                                                                                                                                                                                                                              |  |
| 14. | I think COVID-19 is serious disease                                                                                                                                        | <ol style="list-style-type: none"> <li>1. Strongly agree</li> <li>2. Agree</li> <li>3. Neutral</li> <li>4. Disagree</li> <li>5. Strongly disagree</li> </ol>                                                                                                                 |  |
| 15. | I think that I may get infected with COVID-19                                                                                                                              | <ol style="list-style-type: none"> <li>1. Strongly agree</li> <li>2. Agree</li> <li>3. Neutral</li> <li>4. Disagree</li> <li>5. Strongly disagree</li> </ol>                                                                                                                 |  |
| 16. | I think that my family member/s may get infected with COVID-19                                                                                                             | <ol style="list-style-type: none"> <li>1. Strongly agree</li> <li>2. Agree</li> <li>3. Neutral</li> <li>4. Disagree</li> <li>5. Strongly disagree</li> </ol>                                                                                                                 |  |
| 17. | I fear to go to crowded places                                                                                                                                             | <ol style="list-style-type: none"> <li>1. Strongly agree</li> <li>2. Agree</li> <li>3. Neutral</li> <li>4. Disagree</li> <li>5. Strongly disagree</li> </ol>                                                                                                                 |  |
| 18. | If I take care, I think I can prevent COVID-19                                                                                                                             | <ol style="list-style-type: none"> <li>1. Strongly agree</li> </ol>                                                                                                                                                                                                          |  |

|     |                                                                                                    |                                                                                    |        |
|-----|----------------------------------------------------------------------------------------------------|------------------------------------------------------------------------------------|--------|
|     |                                                                                                    | 2. Agree<br>3. Neutral<br>4. Disagree<br>5. Strongly disagree                      |        |
| 19. | If people take care, I think it is possible to prevent COVID-19                                    | 1. Strongly agree<br>2. Agree<br>3. Neutral<br>4. Disagree<br>5. Strongly disagree |        |
| 20. | I don't believe that COVID-19 patient can be cured if they get care from health facilities         | 1. Strongly agree<br>2. Agree<br>3. Neutral<br>4. Disagree<br>5. Strongly disagree |        |
| 21. | I think there is no benefit of taking a person with COVID-19 symptoms and signs to health facility | 1. Strongly agree<br>2. Agree<br>3. Neutral<br>4. Disagree<br>5. Strongly disagree |        |
| 22. | I think we can prevent COVID-19 if we keep our hands clean                                         | 1. Strongly agree<br>2. Agree<br>3. Neutral<br>4. Disagree<br>5. Strongly disagree |        |
| 23. | I think corona cases should stay at COVID-19 treatment center                                      | 1. Strongly agree<br>2. Agree<br>3. Neutral<br>4. Disagree<br>5. Strongly disagree |        |
| 24. | If I get corona, I think I would stay at COVID-19 treatment center                                 | 1. Strongly agree<br>2. Agree<br>3. Neutral<br>4. Disagree<br>5. Strongly disagree |        |
| 25. | Is your view towards COVID-19 changed over time since you first heard about it?                    | 1. Yes<br>2. No                                                                    | 2 → 27 |
| 26. | If yes, what is/are your reason/s for changing views?                                              | _____                                                                              |        |
|     | Media preferences                                                                                  |                                                                                    |        |
| 27. | What is/are your common source of information?<br>(MULTIPLE RESPONSES, DO NOT READ OPTIONS)        | 1. Radio<br>2. Television<br>3. Social media<br>4. Ethio telecom                   |        |

|     |                                                                                                                                                                                               |                                                                                                                                                                                                                                                                                                                                                                                  |  |
|-----|-----------------------------------------------------------------------------------------------------------------------------------------------------------------------------------------------|----------------------------------------------------------------------------------------------------------------------------------------------------------------------------------------------------------------------------------------------------------------------------------------------------------------------------------------------------------------------------------|--|
|     |                                                                                                                                                                                               | <ol style="list-style-type: none"> <li>5. Leaflet</li> <li>6. Health workers</li> <li>7. Community meetings</li> <li>8. Friends</li> <li>9. Family members</li> <li>10. School</li> <li>11. Other (Specify)<br/>_____</li> </ol>                                                                                                                                                 |  |
| 28. | <p>If you want to know more about COVID-19, what will be your choice of information source?<br/>(SELECT ONE, DO NOT READ OPTIONS)</p>                                                         | <ol style="list-style-type: none"> <li>1. Radio</li> <li>2. Television</li> <li>3. Social media</li> <li>4. Ethio telecom</li> <li>5. Leaflet</li> <li>6. Health workers</li> <li>7. Community meetings</li> <li>8. Friends</li> <li>9. Family members</li> <li>10. School</li> <li>11. Other (Specify)<br/>_____</li> </ol>                                                     |  |
|     | <b>Practice</b>                                                                                                                                                                               |                                                                                                                                                                                                                                                                                                                                                                                  |  |
| 29. | <p>From health messages delivered to prevent and control COVID-19, what prevention method do you practice?<br/>(MULTIPLE RESPONSE, DONOT READ OPTIONS, FILL MASK USE ONLY BY OBSERVATION)</p> | <ol style="list-style-type: none"> <li>1. Social distancing</li> <li>2. Usually wash had with soap or use sanitizer</li> <li>3. Do not touch eye, mouth and nose with dirty hands</li> <li>4. Wear face mask</li> <li>5. Drink hot drinks</li> <li>6. Keep hygiene and sanitation</li> <li>7. Take spices</li> <li>8. Do sport</li> <li>9. Others (Specify)<br/>_____</li> </ol> |  |
| 30. | <p>Type of mask<br/>(fill by observation)</p>                                                                                                                                                 | <ol style="list-style-type: none"> <li>1. Medical (N95, surgical)</li> <li>2. Non-medical</li> </ol>                                                                                                                                                                                                                                                                             |  |
| 31. | <p>If mask is not medical, how often you wash it?</p>                                                                                                                                         | <ol style="list-style-type: none"> <li>1. Never cleaned</li> <li>2. Use and throw</li> <li>3. Twice a day</li> <li>4. Daily</li> <li>5. Every other day</li> <li>6. Every third day</li> <li>7. Others (Specify)<br/>_____</li> </ol>                                                                                                                                            |  |
| 32. | <p>If mask is not medical, how do you wash it?</p>                                                                                                                                            | <ol style="list-style-type: none"> <li>1. Never washed</li> <li>2. Using water</li> <li>3. Using water and soap</li> </ol>                                                                                                                                                                                                                                                       |  |

|     |                                                                                                                             |                                                                                                                                                                                             |  |
|-----|-----------------------------------------------------------------------------------------------------------------------------|---------------------------------------------------------------------------------------------------------------------------------------------------------------------------------------------|--|
|     |                                                                                                                             | 4. Others (Specify)                                                                                                                                                                         |  |
| 33. | What are challenges you face to wash your hands with soap for at least 20 seconds or clean hands with sanitizer frequently? | 1. No problem<br>2. Shortage of water<br>3. Shortage of soap<br>4. Shortage of sanitizer<br>5. Others (Specify)                                                                             |  |
| 34. | What are challenges for you to keep social distancing?                                                                      | 1. No problem<br>2. Nature of job<br>3. People discourage<br>4. Difficult because of culture<br>5. Others (Specify)                                                                         |  |
| 35. | What are challenges for you to stay at home?                                                                                | 1. No problem<br>2. Nature of job<br>3. Social life<br>4. Medical appointment<br>5. Others (Specify)                                                                                        |  |
| 36. | What are challenges you face to wear mask?                                                                                  | 1. No problem<br>2. No mask<br>3. Suffocation<br>4. Dislike it<br>5. People scoff<br>6. Costly<br>7. Others (Specify)                                                                       |  |
| 37. | What are challenges you face not to handshake?                                                                              | 1. No problem<br>2. People oppress me<br>3. Frequently forget<br>4. I don't think there is problem with handshaking<br>5. It is difficult since it is God's goodwill<br>6. Others (Specify) |  |
|     | <b>Socio-demographic data</b>                                                                                               |                                                                                                                                                                                             |  |
| 38. | Age<br>(If doesn't know, type 999)                                                                                          | _____                                                                                                                                                                                       |  |
| 39. | Sex                                                                                                                         | 1. Male<br>2. Female                                                                                                                                                                        |  |
| 40. | Marital status                                                                                                              | 1. Single<br>2. Married<br>3. Divorced<br>4. Widowed<br>5. Living separately                                                                                                                |  |
| 41. | Educational status                                                                                                          | 1. Can't read and write                                                                                                                                                                     |  |

|     |                   |                                                                                                                                                                                       |  |
|-----|-------------------|---------------------------------------------------------------------------------------------------------------------------------------------------------------------------------------|--|
|     |                   | <ol style="list-style-type: none"> <li>2. Read and write only</li> <li>3. Primary (1-8)</li> <li>4. Secondary (9-12)</li> <li>5. Certificate</li> <li>6. Diploma and above</li> </ol> |  |
| 42. | Occupation        | <ol style="list-style-type: none"> <li>1. Student</li> <li>2. Farmer</li> <li>3. Merchant</li> <li>4. Employee</li> <li>5. Housewife</li> <li>6. Other (Specify)<br/>_____</li> </ol> |  |
| 43. | Living condition  | <ol style="list-style-type: none"> <li>1. Private</li> <li>2. Rental</li> <li>3. Cohabitant</li> <li>4. Other (Specify)<br/>_____</li> </ol>                                          |  |
| 44. | Number of rooms   |                                                                                                                                                                                       |  |
| 45. | Total family size |                                                                                                                                                                                       |  |
| 46. | Monthly income    |                                                                                                                                                                                       |  |
| 47. | Religion          | <ol style="list-style-type: none"> <li>1. Orthodox</li> <li>2. Protestant</li> <li>3. Muslim</li> <li>4. Catholic</li> <li>5. Other (Specify)<br/>_____</li> </ol>                    |  |

1  
2  
3  
4  
5  
6  
7  
8  
9  
10  
11  
12  
13  
14  
15  
16  
17  
18  
19  
20  
21  
22  
23  
24  
25  
26  
27  
28  
29  
30  
31  
32  
33  
34  
35  
36  
37  
38  
39  
40  
41  
42  
43  
44  
45  
46  
47  
48  
49  
50  
51  
52  
53  
54  
55  
56  
57  
58  
59  
60STROBE Statement—Checklist of items that should be included in reports of *cross-sectional studies*

|                              | Item No | Recommendation                                                                                                                                                                                    | Assessment result** |
|------------------------------|---------|---------------------------------------------------------------------------------------------------------------------------------------------------------------------------------------------------|---------------------|
| <b>Title and abstract</b>    | 1       | (a) Indicate the study's design with a commonly used term in the title or the abstract                                                                                                            | √ (Page 1)          |
|                              |         | (b) Provide in the abstract an informative and balanced summary of what was done and what was found                                                                                               | √ (Page 1)          |
| <b>Introduction</b>          |         |                                                                                                                                                                                                   |                     |
| Background/rationale         | 2       | Explain the scientific background and rationale for the investigation being reported                                                                                                              | √ (Page 3)          |
| Objectives                   | 3       | State specific objectives, including any prespecified hypotheses                                                                                                                                  | √ (Page 3)          |
| <b>Methods</b>               |         |                                                                                                                                                                                                   |                     |
| Study design                 | 4       | Present key elements of study design early in the paper                                                                                                                                           | √ (Page 3)          |
| Setting                      | 5       | Describe the setting, locations, and relevant dates, including periods of recruitment, exposure, follow-up, and data collection                                                                   | √ (Page 3)          |
| Participants                 | 6       | (a) Give the eligibility criteria, and the sources and methods of selection of participants                                                                                                       | √ (Page 4)          |
| Variables                    | 7       | Clearly define all outcomes, exposures, predictors, potential confounders, and effect modifiers. Give diagnostic criteria, if applicable                                                          | √ (Page 4)          |
| Data sources/<br>measurement | 8*      | For each variable of interest, give sources of data and details of methods of assessment (measurement). Describe comparability of assessment methods if there is more than one group              | √ (Page 3)          |
| Bias                         | 9       | Describe any efforts to address potential sources of bias                                                                                                                                         | √ (Page 4)          |
| Study size                   | 10      | Explain how the study size was arrived at                                                                                                                                                         | √ (Page 3)          |
| Quantitative variables       | 11      | Explain how quantitative variables were handled in the analyses. If applicable, describe which groupings were chosen and why                                                                      | √ (Page 4)          |
| Statistical methods          | 12      | (a) Describe all statistical methods, including those used to control for confounding                                                                                                             | √ (Page 4)          |
|                              |         | (b) Describe any methods used to examine subgroups and interactions                                                                                                                               | NA                  |
|                              |         | (c) Explain how missing data were addressed                                                                                                                                                       | NA                  |
|                              |         | (d) If applicable, describe analytical methods taking account of sampling strategy                                                                                                                | NA                  |
|                              |         | (e) Describe any sensitivity analyses                                                                                                                                                             | NA                  |
| <b>Results</b>               |         |                                                                                                                                                                                                   |                     |
| Participants                 | 13*     | (a) Report numbers of individuals at each stage of study—eg numbers potentially eligible, examined for eligibility, confirmed eligible, included in the study, completing follow-up, and analysed | √ (Page 5)          |
|                              |         | (b) Give reasons for non-participation at each stage                                                                                                                                              | √ (Page 5)          |
|                              |         | (c) Consider use of a flow diagram                                                                                                                                                                | X                   |
| Descriptive data             | 14*     | (a) Give characteristics of study participants (eg demographic, clinical, social) and information on exposures and potential confounders                                                          | √ (Page 5)          |
|                              |         | (b) Indicate number of participants with missing data for each variable of interest                                                                                                               | √ (Page 5)          |
| Outcome data                 | 15*     | Report numbers of outcome events or summary measures                                                                                                                                              | √ (Page 7)          |

|    |                          |    |                                                                         |
|----|--------------------------|----|-------------------------------------------------------------------------|
| 1  |                          |    |                                                                         |
| 2  | Main results             | 16 | (a) Give unadjusted estimates and, if applicable, confounder-           |
| 3  |                          |    | adjusted estimates and their precision (eg, 95% confidence interval).   |
| 4  |                          |    | Make clear which confounders were adjusted for and why they were        |
| 5  |                          |    | included                                                                |
| 6  |                          |    |                                                                         |
| 7  |                          |    | (b) Report category boundaries when continuous variables were           |
| 8  |                          |    | categorized                                                             |
| 9  |                          |    |                                                                         |
| 10 |                          |    | (c) If relevant, consider translating estimates of relative risk into   |
| 11 |                          |    | absolute risk for a meaningful time period                              |
| 12 | Other analyses           | 17 | Report other analyses done—eg analyses of subgroups and                 |
| 13 |                          |    | interactions, and sensitivity analyses                                  |
| 14 |                          |    |                                                                         |
| 15 | <b>Discussion</b>        |    |                                                                         |
| 16 | Key results              | 18 | Summarise key results with reference to study objectives                |
| 17 |                          |    |                                                                         |
| 18 | Limitations              | 19 | Discuss limitations of the study, taking into account sources of        |
| 19 |                          |    | potential bias or imprecision. Discuss both direction and magnitude     |
| 20 |                          |    | of any potential bias                                                   |
| 21 | Interpretation           | 20 | Give a cautious overall interpretation of results considering           |
| 22 |                          |    | objectives, limitations, multiplicity of analyses, results from similar |
| 23 |                          |    | studies, and other relevant evidence                                    |
| 24 |                          |    |                                                                         |
| 25 | Generalisability         | 21 | Discuss the generalisability (external validity) of the study results   |
| 26 |                          |    |                                                                         |
| 27 | <b>Other information</b> |    |                                                                         |
| 28 | Funding                  | 22 | Give the source of funding and the role of the funders for the          |
| 29 |                          |    | present study and, if applicable, for the original study on which the   |
| 30 |                          |    | present article is based                                                |
| 31 |                          |    |                                                                         |

\*Give information separately for exposed and unexposed groups.

**Note:** An Explanation and Elaboration article discusses each checklist item and gives methodological background and published examples of transparent reporting. The STROBE checklist is best used in conjunction with this article (freely available on the Web sites of PLoS Medicine at <http://www.plosmedicine.org/>, Annals of Internal Medicine at <http://www.annals.org/>, and Epidemiology at <http://www.epidem.com/>). Information on the STROBE Initiative is available at [www.strobe-statement.org](http://www.strobe-statement.org).
